# Activity-based urinary biomarkers of response and resistance to checkpoint blockade immunotherapy

**Authors:** Quoc Mac<sup>1</sup>, Congmin Xu<sup>1</sup>, James R Bowen<sup>1</sup>, Anirudh Sivakumar<sup>1</sup>, Hathaichanok Phuengkhom<sup>1</sup>, Fang-Yi Su<sup>1</sup>, Samuel Z. Stentz<sup>1</sup>, Hyoungjun Sim<sup>1</sup>, Adrian M. Harris<sup>1</sup>, Tonia T. Li<sup>1</sup>, Peng Qiu<sup>1,2,5</sup>, Gabriel A. Kwong<sup>1-6,\*</sup>

## Affiliations:

<sup>1</sup>Wallace H. Coulter Department of Biomedical Engineering, Georgia Tech College of Engineering and Emory School of Medicine, Atlanta, GA 30332, USA.

<sup>2</sup>Parker H. Petit Institute of Bioengineering and Bioscience, Atlanta, GA 30332, USA.

<sup>3</sup>Institute for Electronics and Nanotechnology, Georgia Tech, Atlanta, GA 30332.

<sup>4</sup>Integrated Cancer Research Center, Georgia Tech, Atlanta, GA 30332.

<sup>5</sup>The Georgia Immunoengineering Consortium, Emory University and Georgia Tech, Atlanta, GA 30332.

<sup>6</sup>Winship Cancer Institute, Emory University, Atlanta, GA 30322

\*To whom correspondence should be addressed: [gkwong@gatech.edu](mailto:gkwong@gatech.edu) (G.A.K.)

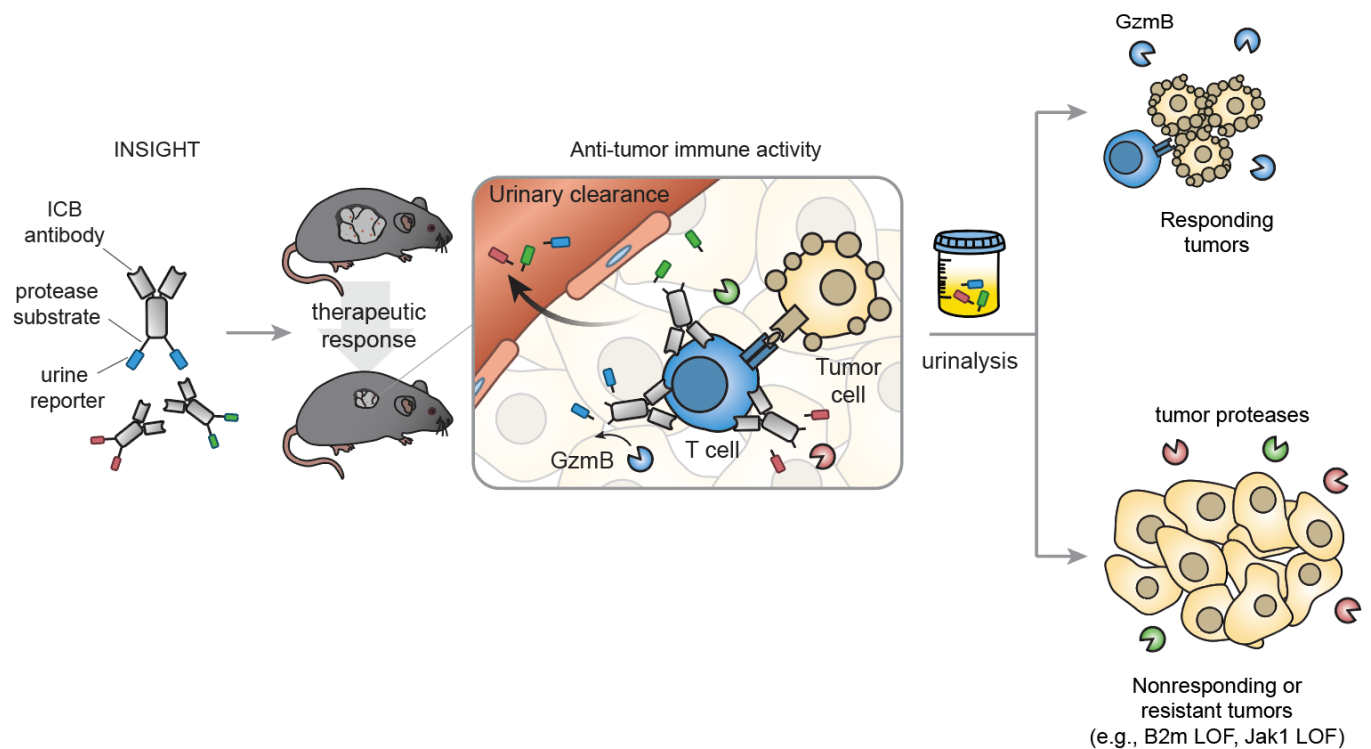

21 **Abstract**

22 Immune checkpoint blockade (ICB) therapy has transformed the clinical care of  
23 cancer, yet the majority of patients do not derive clinical benefit and responders can  
24 acquire resistance to therapy. Noninvasive biomarkers to indicate early on-treatment  
25 response and resistance mechanisms are needed to improve patient management. We  
26 engineer activity-based synthetic biomarkers called immune sensors for monitoring  
27 checkpoint blockade therapy (INSIGHT), which comprise a library of mass-barcoded  
28 peptides conjugated to ICB antibodies (e.g.,  $\alpha$ PD1). INSIGHT allows detection of *in vivo*  
29 T cell and tumor protease activity by quantification of cleaved peptide fragments that have  
30 cleared into urine.  $\alpha$ PD1-sensor conjugates monitoring the T cell protease granzyme B  
31 (GzmB) retained target binding and were capable of sensing T cell killing of cancer cells.  
32 In syngeneic tumors, systemic administration of these conjugates resulted in therapeutic  
33 efficacy comparable to unconjugated antibodies and produced elevated reporter signals  
34 in urine indicative of tumor responses by the second dose. To differentiate resistant  
35 tumors, we analyzed the transcriptomes of ICB-treated tumors for protease signatures of  
36 response and resistance and developed a multiplexed library of mass-barcoded protease  
37 sensors. This library enabled us to build machine learning classifiers based on urine  
38 signals that detected and stratified two mechanisms of resistance, B2m and Jak1 loss-of-  
39 function mutations. Our data demonstrates the potential of INSIGHT for early on-  
40 treatment response assessment and classification of refractory tumors based on  
41 resistance mechanisms.

42

43

## 44 **Introduction**

45 Immune checkpoint blockade (ICB) therapy has transformed the treatment of  
46 cancer for patients across a broad range of malignancies<sup>1,2</sup>. ICB involves the  
47 administration of antibodies that block inhibitory checkpoint molecules, such as the  
48 cytotoxic T lymphocyte-associated protein 4 (CTLA-4) or the programmed cell death 1  
49 (PD-1), to invigorate an anti-tumor T cell response. Since the approval of ipilimumab  
50 ( $\alpha$ CTLA-4) for the treatment of melanoma in 2011, seven ICB biologics have been  
51 approved by the FDA as part of standard of care for patients with advanced tumors,  
52 including non-small cell lung cancer, head and neck cancer, and metastatic colorectal  
53 cancer. Despite the potential to produce durable clinical outcomes, a large fraction of  
54 patients do not benefit from ICB therapy and responders acquire resistance over the  
55 course of treatment<sup>1,3</sup>. Identification of pharmacodynamic (PD) biomarkers to assess  
56 immune responses and classify resistant tumors early on-treatment has emerged as a  
57 clinical priority.

58 Currently, tumor responses to ICB therapy are assessed using a combination of  
59 radiologic imaging, tumor biopsies, and blood tests<sup>4</sup>. Radiologic imaging consists of  
60 monitoring changes in tumor dimension and classifying patients into response categories  
61 according to evaluation criteria such as RECIST, irRC, or irRECIST. The kinetics and  
62 patterns of response to ICB therapy, consisting of delayed objective responses and  
63 atypical phenomena (e.g., pseudoprogression, hyperprogression), are different than that  
64 of conventional cytotoxic therapies and can complicate clinical interpretation by  
65 imaging<sup>4,5</sup>. Complementary to imaging data, longitudinal tumor biopsies and blood tests  
66 offer clinical insights into the immunological changes of the tumor and peripheral blood

67 during the course of treatment. Analyses of core tumor biopsies from ICB-treated patients  
68 have shown that patient prognoses correlate with T cell activity, such as high density of  
69 CD8+ T cells with elevated expression of IFN $\gamma$  and granzymes, low density of regulatory  
70 T cell, and high expression of IFN $\gamma$ -induced PD-L1 in tumor cells<sup>2,6</sup>. Additionally, genomic  
71 analyses of tumor biopsies revealed that mutations in antigen processing (e.g., TAP1,  
72 TAP2), antigen presentation (e.g, B2m), and interferon signaling (e.g., JAK1, JAK2)  
73 contribute to tumor-intrinsic resistance to ICB therapy<sup>3,7</sup>. Immune analyses of peripheral  
74 blood discovered potential biomarkers for response to ICB, including soluble proteins  
75 (e.g., LDH, sCD25, IL-8) and cellular composition (e.g., absolute lymphocyte count,  
76 CD45RO+CD8+ count, neutrophil-to-lymphocyte ratio)<sup>4</sup>. These findings highlight the  
77 potential of biomarkers that probe immune activation and the tumor microenvironment to  
78 accurately predict patient responses to ICB therapy

79 Proteases provide a unique opportunity for the evaluation of ICB therapy due to  
80 their fundamental role in tumor biology, immunity, and anti-tumor responses. Tumor-  
81 associated proteases are involved in proteolytic cascades that modify the tumor  
82 microenvironment (TME) during angiogenesis, growth, and metastasis<sup>8</sup>. In addition, T  
83 cell-mediated tumor control centers on a protease-driven process that includes secretion  
84 of granzymes by cytotoxic T cells and activation of caspases to mediate cancer cell death  
85 <sup>9</sup>. Consequently, these protease signatures can be used to track tumor progression and  
86 regression, monitor anti-tumor immune activities, and provide early indications of  
87 therapeutic response and resistance during ICB therapy<sup>10–15</sup>. Of note, the cytolytic score,  
88 defined as the geometric mean of the expression of granzymes and perforin, is associated  
89 with tumor mutation burden (TMB) and response to  $\alpha$ CTLA-4 in metastatic melanoma<sup>16</sup>.

90 Prodrugs and diagnostics that exploit tumor- and immune-associated proteases are being  
91 evaluated in clinical trials, including masked ICB antibodies, which bind to inhibitory  
92 targets after cleavage by tumor-secreted matrix metalloproteases (MMPs)<sup>17</sup>, and GzmB-  
93 PET, which labels the active form of GzmB in the tumors for response monitoring<sup>14</sup>.  
94 Furthermore, nanoparticles monitoring the activity of GzmB enabled noninvasive  
95 detection of anti-graft T cell response in a mouse model of skin transplantation<sup>18</sup>.  
96 Motivated by these works, we hypothesized that quantifying the activity of tumor and T  
97 cell proteases during ICB treatment may enable detection of therapeutic responses and  
98 classification of resistant tumors.

99 Here we engineered INSIGHT, immune sensors for monitoring checkpoint  
100 blockade therapy, as a noninvasive technology that provides diagnostic insights into  
101 patient immune responses and resistance during ICB treatment. In INSIGHT, each  $\alpha$ PD1-  
102 or  $\alpha$ CTLA4-sensor conjugate consists of protease-sensing peptides coupled to the  
103 antibody scaffold. Treatments with these conjugates enable local cleavage of peptide  
104 substrates by proteases in the TME, releasing terminal reporters that are remotely filtered  
105 into urine for noninvasive detection of tumor responses. We first developed  $\alpha$ PD1-GzmB  
106 sensor conjugates that retained target binding to PD1 ligand while being capable of  
107 sensing T cell-mediated killing of cancer cells. In tumor models of ICB response, these  
108 conjugates produced increased urine signals to detect early on-treatment therapeutic  
109 responses. By analyzing the transcriptomes of ICB-treated mouse and human tumors,  
110 we identified protease signatures of tumor response and resistance, which motivated the  
111 development of a multiplexed library of mass-barcoded protease sensors for  
112 comprehensive response assessment during ICB therapy. In mice bearing responsive

113 wild-type (WT) tumors or resistant knockout (KO) tumors, systemic administration of this  
114 library enabled us to build urinary classifiers that segregated WT responders, B2m loss  
115 resistance, and Jak1 loss resistance with high diagnostic validity. Our data demonstrate  
116 the potential of INSIGHT for monitoring therapeutic responses and classifying underlying  
117 resistance mechanisms.

118

119

120

121

122

123

124

125

126

127

128

129

130

131

132

133 **Results**

134 *Antibody-peptide sensor conjugates retain target binding and in vivo therapeutic efficacy*

135 We first sought to characterize target binding and therapeutic efficacy of antibody-  
136 peptide conjugates for use in INSIGHT.  $\alpha$ PD1-GzmB sensor conjugates ( $\alpha$ PD1-GS) were  
137 formulated by coupling fluorescently labeled peptide substrates for murine GzmB  
138 (IEFDSG<sup>18</sup>) to the antibody using a heterobifunctional linker (**Fig. 1a**). To ensure that  
139 peptide conjugation did not interfere with PD1 binding, we optimized the ratio of peptide  
140 to antibody using an ELISA with recombinant PD1 protein. We found that target binding  
141 of mouse  $\alpha$ PD1-GS (clone 8H3) was reduced, with an increase of EC50 constants from  
142 6.36 nM to 24.0 nM, as we increased the valency of peptide to antibody from 1 to 7 (**SFig.**  
143 **1a**). Since the conjugate with 1:1 valency had negligible reduction in target binding  
144 relative to that of the unconjugated antibody (EC50 = 3.6 nM vs. 2.1 nM), we decided to  
145 use this conjugation condition in subsequent studies (**Fig. 1b**). To test whether this  
146 valency is applicable for other therapeutic antibodies, we coupled peptides to another  
147  $\alpha$ PD1 clone (29F.1A12) and found that target binding was preserved between  $\alpha$ PD1-GS  
148 and unconjugated antibody (EC50 = 0.15 nM vs. 0.18 nM) (**Fig. 1c**). Since ligand  
149 presentation of plate-bound recombinant PD1 differed from that of endogenous PD1  
150 expressed on cell surface, we next evaluated target binding of  $\alpha$ PD1-GS to tumor  
151 infiltrating lymphocytes (TILs) extracted from MC38 tumors. We used the MC38 colon  
152 adenocarcinoma syngeneic tumor model because these cancer cells have a high  
153 mutation burden, which has been shown to recruit a natural infiltrate of T cells required  
154 for an effective anti-tumor response following  $\alpha$ PD1 monotherapy<sup>19</sup>. Flow cytometry  
155 analysis of CD8+ TILs stained with either  $\alpha$ PD1-GS or unconjugated  $\alpha$ PD1 showed

156 statistically equivalent PD1 expression by median fluorescence intensity (MFI),  
157 demonstrating that peptide conjugation did not significantly affect target binding to  
158 endogenous PD1 ligand expressed on cell surfaces (n = 10, **Fig. 1d, e**). Finally, to directly  
159 compare *in vivo* therapeutic efficacy of  $\alpha$ PD1-GS to  $\alpha$ PD1, we administered each  
160 formulation to mice bearing MC38 tumors. Systemic injections of  $\alpha$ PD1-GS significantly  
161 enhanced tumor control relative to IgG1 isotype control antibody and resulted in no  
162 statistical difference in tumor burden compared to unconjugated  $\alpha$ PD1 ( $P \leq 0.0001$ , n =  
163 **6, Fig. 1f**). Taken together, these data demonstrate that relative to unconjugated  
164 antibody,  $\alpha$ PD1-peptide conjugates preserved both target binding on CD8+ T cell  
165 surfaces and *in vivo* therapeutic efficacy.

166

167

168

169

170

171

172

173

174

175

176

177

178



179 *Antibody-sensor conjugates monitor GzmB activity during T cell killing of tumor cells*

180 To investigate whether the antibody-peptide conjugates could monitor protease  
181 activity, we sought to evaluate GzmB substrate cleavage on  $\alpha$ PD1-GS and assess its  
182 potential for monitoring anti-tumor T cell killing *in vitro*. To quantify GzmB cleavage as a  
183 measure of sensor activation, we incorporated an internal dark quencher on one end of  
184 the peptide substrate, whose cleavage releases a terminal fluorescent reporter to  
185 substantially enhance sample fluorescence (**Fig. 2a**). We first assessed substrate  
186 specificity for GzmB by exposing  $\alpha$ PD1-GS to fresh mouse serum, tumor-associated  
187 proteases (e.g., cathepsin B, MMP9), or coagulation and complement proteases (e.g.,  
188 C1s, thrombin). When  $\alpha$ PD1-GS was incubated with mouse serum or recombinant  
189 proteases, we did not observe detectable increases in fluorescence that would indicate  
190 cross-cutting of our sensors (**Fig. 2b**). Conversely, incubation with GzmB produced a 22-  
191 fold increase in sensor fluorescence intensity. To evaluate the ability of our sensors to  
192 detect GzmB activity by T cells, we used a T cell killing assay in which transgenic Pmel T  
193 cells recognize the gp100 antigen expressed on B16 melanoma cells (**Fig. 2a**). Because  
194 our sensors were engineered to detect GzmB activity, we first quantified the amount of  
195 extracellular GzmB in coculture supernatants by ELISA and detected a 10-fold increase  
196 in GzmB levels as the ratio of T cells to target cells was increased from 1 to 10 ( $P \leq$   
197 0.0001,  $n = 3$ , **Fig. 2c**). Next, to characterize target cell cytotoxicity in cocultures with T  
198 cells, we quantified the activity of lactose dehydrogenase (LDH), a cytosolic enzyme  
199 rapidly released upon damage to the cell membrane. We detected a significant increase  
200 in cytotoxicity from 13 to 56 % as the ratio of Pmel T cells to B16 target cells was increased  
201 from 1 to 10 ( $P \leq 0.001$ ,  $n = 3$ , **Fig. 2c**). To test background sensor activation by either

202 tumor cells or T cells alone, we incubated  $\alpha$ PD1-GS with media control, MC38 and CT26  
203 colon carcinoma cells, B16 melanoma cells, and activated Pmel T cells with or without  
204 target cells. We observed that both tumor cells and activated Pmel T cells did not  
205 significantly activate the GzmB sensors as measured by sample fluorescence. By  
206 contrast, coincubation of Pmel T cells with B16 target cells significantly increased this  
207 activation signal up to 4.6-fold ( $P \leq 0.0001$ ,  $n = 3$ , **Supplemental Fig. 2**). To assess the  
208 ability to monitor T cell killing, we coincubated Pmel T cells with B16 target cells at various  
209 ratios and spiked in either  $\alpha$ PD1-GS, an  $\alpha$ PD1-sensor with a control peptide substrate  
210 lacking GzmB cleavage motif, or unconjugated  $\alpha$ PD1 antibody. Whereas the  $\alpha$ PD1-  
211 sensor control and unconjugated  $\alpha$ PD1 antibody did not produce detectable increases in  
212 fluorescence,  $\alpha$ PD1-GS was markedly activated in all coculture conditions, with  
213 fluorescent signals increasing by more than 4-fold as we increased the Pmel to B16 ratio  
214 from 1 to 10 ( $P \leq 0.0001$ ,  $n = 3$ , **Fig. 2e**). Lastly, we investigated the utility of our sensors  
215 to monitor antigen-specific T cell killing in cocultures of B16 target cells with Pmel or  
216 control OT1 T cells. While the OT1 cocultures did not produce significant increases in  
217 sensor fluorescence at the 10:1 ratio of OT1 T cells to B16 target cells, Pmel cocultures  
218 activated our sensors at all ratios ( $P \leq 0.0001$ ,  $n = 4$ , **Fig. 2f**). Collectively, these data  
219 demonstrate that  $\alpha$ PD1-GS was cleaved selectively by GzmB and can be used to detect  
220 antigen-specific T cell killing of tumor cells.

221

222

223

224

225 *Noninvasive detection of early on-treatment response to ICB therapy*

226 Conjugation of peptides to antibody has been shown to extend the circulation half-  
227 life of free peptides without affecting that of the antibody carrier<sup>17,20</sup>. We therefore  
228 investigated whether the circulation of GzmB-sensing peptides was improved upon  
229 conjugation by determining the half-life of intact  $\alpha$ PD1-GS in naïve mice. To quantify the  
230 serum concentration of  $\alpha$ PD1-GS, we developed a sandwich ELISA that requires binding  
231 to both recombinant PD1 ligand and the FITC reporter on the peptide to produce a  
232 detection signal (**Supplemental Fig. 3a**). We observed that  $\alpha$ PD1-GS produced  
233 significantly higher absorbance signals relative to unconjugated  $\alpha$ PD1 antibody ( $P \leq$   
234  $0.001$ ,  $n = 3$ ), and incubation with GzmB significantly decreased this signal up to 4-fold,  
235 due to the cleavage of FITC-labelled peptides ( $P \leq 0.001$ ,  $n = 3$ , **Supplemental Fig. 3b,**  
236 **3c**). Using this assay, we determined that the circulation half-life of  $\alpha$ PD1-GS was not  
237 statistically different than that of unconjugated  $\alpha$ PD1 antibody ( $6.5 \pm 4.2$  h vs  $3.9 \pm 1.3$  h,  
238  $n = 3$ ) and consistent with reported values for  $\alpha$ PD1 antibodies<sup>21</sup> ( $n = 3$ , **Fig. 3a**).

239 Patient responses to ICB can have aberrant kinetics, with positive responses and  
240 hyperprogression having been observed after one or two doses<sup>22,23</sup>. Since early detection  
241 of therapeutic outcomes has the potential to improve patient management, we sought to  
242 investigate the utility of INSIGHT probes for monitoring tumor responses after the first few  
243 ICB doses. We first administered  $\alpha$ PD1-GS or matched isotype control (Iso-GS) to  
244 C57BL/6 mice bearing MC38 tumors. To characterize the expression of GzmB during the  
245 early course of ICB treatment, we isolated TILs after two doses of antibody and analyzed  
246 CD8+ T cells by flow cytometry. We observed that mice treated with  $\alpha$ PD1 had significant  
247 increases in GzmB+ CD8+ TILs relative to those treated with isotype control ( $P \leq 0.001$ ,

248 n = 9, **Fig. 3b, c**). These results were consistent with previous mouse and human studies  
249 and supported the role of GzmB-mediated tumor control in T cell responses after ICB  
250 treatment<sup>16,24</sup>. Additionally, serial treatments with  $\alpha$ PD1-GS significantly lowered MC38  
251 tumor burden relative to the control treatment after two doses ( $P \leq 0.001$ , n = 6, **Fig. 3d**).  
252 To evaluate the potential for serial on-treatment response assessment, we analyzed the  
253 concentration of the cleaved reporter in urine samples after each dose of administration.  
254 After the first dose, there was no statistical difference in urine signals of mice treated with  
255 either  $\alpha$ PD1-GS or Iso-GS. By contrast, urine signals were significantly elevated in  $\alpha$ PD1-  
256 GS-treated mice after the second ( $P \leq 0.01$ , n = 7) and third doses ( $P \leq 0.0001$ , n = 7),  
257 detecting GzmB activity two days before tumor burden significantly diverged between  
258  $\alpha$ PD1-GS-treated and Iso-GS-treated mice (**Fig 3e**). This elevation in urine signals  
259 corresponded with a diagnostic AUROC of 0.86 and 1.00 on the second and third doses,  
260 respectively.

261 To evaluate whether ICB-sensor conjugates can detect therapeutic responses  
262 during combination therapy, we tested their performance in BALB/c syngeneic CT26  
263 tumors, which have shown better responses to ICB combination relative to  
264 monotherapy<sup>25,26</sup>. Relative to matched isotype control conjugates, serial treatments with  
265 either  $\alpha$ PD1-GS or  $\alpha$ CTLA4-GS did not result in statistical differences in tumor burden  
266 and urine signals after all doses of administration (**Supplemental Fig. 4a, b, c, d**). By  
267 contrast, combination treatments with of  $\alpha$ PD1-GS and  $\alpha$ CTLA4 resulted in significantly  
268 lower tumor burden ( $P \leq 0.0001$ , n = 6, **Fig. 3f**) and higher levels of GzmB+ CD8+ TILs  
269 ( $P \leq 0.05$ , n = 7, **Supplemental Fig. 5a, b**). Additionally, urine signals were significantly  
270 elevated by the second dose in combination therapy-treated mice relative to the control

271 group (AUROC > 0.9), three days before tumor burden was statistically different between  
272 the two groups ( $P \leq 0.0001$ ,  $n = 6$ , **Fig. 3g**). Collectively, these results demonstrate that  
273 systemic administration of  $\alpha$ PD1-GS enabled noninvasive detection of therapeutic  
274 responses within the first two doses of treatment with high diagnostic sensitivity and  
275 specificity.

276

277

278

279

280

281

282

283

284

285

286

287

288

289

290

291

292

293

294 *Modelling resistance to ICB therapy by targeted gene knockout*

295 Early detection of primary and acquired resistance has the potential to improve the  
296 clinical decision-making during ICB therapy. Tumors become resistant to checkpoint  
297 inhibitors by disrupting pathways related to the initiation and maintenance of an effective  
298 anti-tumor T cell response, including loss-of-function mutations in B2M, a protein subunit  
299 of MHC-I, or JAK1, an essential signaling protein of the IFN $\gamma$  response pathway<sup>3,7</sup>. As  
300 genetic disruptions in these important immune genes lead to marked changes in the  
301 tumor behaviors and anti-tumor immunity, tumor- and immune-associated proteases are  
302 potentially dysregulated. To assess the potential of INSIGHT to sense dysregulated  
303 proteases in the context of ICB resistance, we developed B2m<sup>-/-</sup> and Jak1<sup>-/-</sup> tumor  
304 models and established their susceptibility to ICB therapy.

305 To model the resistant phenotypes observed in human tumors, we used  
306 CRISPR/Cas9 to knock out B2m and Jak1 from wildtype (WT) MC38 tumor cells. We first  
307 validated the knockout efficiency by TIDE (Tracking of Indels by Decomposition)  
308 analysis<sup>27</sup> of sequencing data (**Supplemental Fig. 6a**). To assess the functional  
309 consequence of B2m<sup>-/-</sup>, we analyzed surface expression of the MHC-I molecule H2-Kb  
310 and found that its expression was markedly lower in B2m<sup>-/-</sup> relative to WT or Jak1<sup>-/-</sup> cells  
311 (**Supplemental Fig. 6b**). In addition, to determine whether B2m<sup>-/-</sup> cells were resistant to  
312 T cell killing, we performed T cell killing assays using transgenic OT1 T cells and WT or  
313 B2m<sup>-/-</sup> MC38 target cells pulsed with the cognate antigen ovalbumin (OVA). Relative to  
314 WT cells, B2m<sup>-/-</sup> target cells induced significantly lower expression of GzmB and IFN $\gamma$  in  
315 cocultured OT1 T cells ( $P \leq 0.05$ ,  $n = 3$ , **Fig. 4a**). To assess the functional consequences  
316 of Jak1<sup>-/-</sup>, we coincubated WT, B2m<sup>-/-</sup>, and Jak1<sup>-/-</sup> cells with IFN $\gamma$  and evaluated the

317 effect of IFN $\gamma$  stimulation on expression of H2-Kb and PD-L1, downstream effectors of  
318 the IFN $\gamma$  signaling pathway<sup>28</sup>. In the presence of IFN $\gamma$ , WT MC38 tumor cells significantly  
319 increased expression of both MHC-I and PD-L1 ( $P \leq 0.0001$ ,  $n = 3$ , **Fig. 4b**,  
320 **Supplemental Fig. 6c**). By contrast, B2m<sup>-/-</sup> cells only upregulated expression of PD-L1  
321 ( $P \leq 0.0001$ ,  $n = 3$ ), and Jak1<sup>-/-</sup> cells did not have significant increases in either MHC-I or  
322 PD-L1 expression. Overall, these data showed that B2m<sup>-/-</sup> cells had impaired antigen  
323 presentation whereas Jak1<sup>-/-</sup> cells were insensitive to IFN $\gamma$  stimulation.

324 To investigate whether knockout tumors are resistant to ICB therapy, we implanted  
325 mice with WT, B2m<sup>-/-</sup>, and Jak1<sup>-/-</sup> MC38 tumors and treated them with either  $\alpha$ PD1 or  
326 IgG1 isotype control. Serial  $\alpha$ PD1 treatments resulted in significantly smaller tumors and  
327 improved survival of WT tumor-bearing mice (MST = 30) relative to the isotype control  
328 (MST = 21) ( $P \leq 0.0001$ ,  $n = 25$ , **Fig. 4c, d**). Conversely,  $\alpha$ PD1 treatments did not result  
329 in statistical differences in tumor burden and overall survival in mice with B2m<sup>-/-</sup> and  
330 Jak1<sup>-/-</sup> tumors. To characterize T cell responses in B2m and Jak1 resistant tumors, we  
331 performed flow cytometry analysis of CD8+ TILs in all treatment groups. We found  
332 significant increases in the populations of GzmB+ and CD44+PD1+ (antigen-  
333 experienced) CD8+ TILs in  $\alpha$ PD1-treated relative to isotype-treated WT tumors ( $P \leq 0.01$ ,  
334  $n = 5$ , **Fig. 4e, f**). By contrast,  $\alpha$ PD1 treatments did not cause an increase in these  
335 populations in B2m<sup>-/-</sup> and Jak1<sup>-/-</sup> tumors. Taken together, our results demonstrate that  
336 loss-of-function mutation in B2m or Jak1 impaired induction and maintenance of an  
337 effective anti-tumor T cell response, which rendered MC38 tumors resistant to  $\alpha$ PD1  
338 therapy.

339

340 *Identification of protease signatures in ICB response and resistance*

341 To detect therapeutic response and differentiate resistance mechanisms, we  
342 sought to identify the proteases that are associated with ICB response and resistance.  
343 We achieved this by sequencing mRNA (RNA-Seq) from WT, B2m<sup>-/-</sup>, and Jak1<sup>-/-</sup> MC38  
344 tumors treated with either αPD1 or IgG1 isotype control. Global gene expression analyzed  
345 by t-SNE plot revealed different transcriptional profiles of the three tumor types (**Fig. 5a**).  
346 Furthermore, treated WT tumors clustered separately from untreated tumors while no  
347 clear separation was observed for treated resistant tumors. Transcript levels of B2m and  
348 Jak1 were significantly lower in their respective knockout tumors, which further validated  
349 the efficiency of the knockout ( $P \leq 0.0001$ ,  $n = 5$ , **Supplemental Fig. 7**). To evaluate the  
350 functional consequences of αPD1 treatment and gene knockout on each tumor, we  
351 performed gene set enrichment analyses (GSEA) on the Hallmark gene sets<sup>29</sup>, using  
352 isotype-treated WT tumors as the control group. Treatment with αPD1 significantly  
353 enriched the immune pathways (e.g., IFN $\gamma$  response, IL2-STAT5 signaling, inflammatory  
354 response, complement) in WT tumors but not in B2m<sup>-/-</sup> and Jak1<sup>-/-</sup> tumors ( $P \leq 0.05$ , **Fig.**  
355 **5b, Supplemental Fig. 8a**), validating the presence of an active immune response in  
356 response to αPD1 treatment in WT tumors. Relative to WT and B2m<sup>-/-</sup> tumors, Jak1<sup>-/-</sup>  
357 tumors significantly downregulated the IFN $\gamma$  response pathway. Furthermore, gene set  
358 signatures related to both pro-tumor (e.g., Myc targets, Epithelial mesenchymal transition)  
359 and immune processes were distinct between the knockout tumors (**Supplemental Fig.**  
360 **8c**), indicative of unique mechanisms regulating resistance. To assess the relevance of  
361 our model of ICB response, we next performed GSEA on bulk tumor RNA-Seq data from  
362 advanced melanoma patients treated with αPD1 monotherapy<sup>24</sup>. Patient samples were



363 separated into responders (CR + PR), non-responders (PD), and stable disease patients  
364 (SD) based on RECIST response criteria. Relative to non-responders, the responders  
365 had significant enrichment in 5 out of 7 Hallmark immune pathways, indicative of  
366 productive anti-tumor immune responses ( $P \leq 0.05$ , **Fig. 5b, Supplemental Fig. 8b**). The  
367 observed conservation between mouse and patient data demonstrates that our model  
368 recapitulated clinically relevance gene signatures of ICB response.

369 We next performed differential expression analysis to identify proteases involved  
370 in ICB response and resistance. Relative to isotype control,  $\alpha$ PD1 treatment induced  
371 significant upregulation of multiple proteases, including granzymes, metalloproteinases,  
372 and cathepsins in WT tumors ( $P \leq 0.05$ , **Fig. 5c, Supplemental Fig. 9a**). Additionally,  
373 analysis on resistant tumors revealed multiple protease classes that were differentially  
374 expressed in  $\alpha$ PD1-treated B2m<sup>-/-</sup> vs. Jak1<sup>-/-</sup> tumors ( $P \leq 0.05$ , **Fig. 5d, Supplemental**  
375 **Fig. 9b**). To validate the clinical relevance of these protease classes, we performed a  
376 similar analysis on the human data set of advance melanoma patients<sup>24</sup>. As observed in  
377 our mouse models, human tumors that responded to ICB (CR + PR) underwent significant  
378 upregulation of granzymes, metalloproteases, cathepsins, complement, and coagulation  
379 proteases relative to non-responders (PD) ( $P \leq 0.01$ , **Fig. 5e, Supplemental Fig. 9c**).  
380 Taken together, these data revealed that proteases are differentially regulated in the  
381 context of tumor response and resistance. Consequently, targeting major classes of  
382 tumor and immune proteases with INSIGHT has the potential to monitor therapeutic  
383 response and classify underlying resistance during ICB therapy.

384

385 *Machine learning classification of ICB response and resistance by multiplexed activity*  
386 *sensors*

387 Here we wanted to design a multiplexed library of antibody-activity sensor  
388 conjugates that produce urinary reporter signals based on which machine learning  
389 classifiers of ICB response and resistance can be built (**Fig. 6a**). After identifying the  
390 families of immune and tumor proteases to target, we sought to optimize peptide  
391 substrates that monitor representative proteases from these families. To do this, we first  
392 selected a library of potential substrates from the literature and validated their cleavage  
393 efficiency in protease activity assays. We incubated each fluorescently quenched  
394 substrate with the representative proteases and measured cleavage activity by monitoring  
395 the change in fluorescence over time (**Supplemental Fig. S10a**). With this screen, we  
396 identified 14 peptide substrates (**Table S1**) that encompass cleavage preferences of the  
397 five target protease families (**Fig. 6b, Supplemental Fig. S10b**). While few substrates  
398 are specific for an individual protease or family of proteases (e.g. L2-1, L3-7, L2-21), many  
399 substrates were cleaved by proteases of multiple families. The latter observation indicates  
400 the promiscuous nature of proteolysis<sup>30</sup> and highlights the importance of monitoring  
401 multiple families of proteases with multiple substrates to capture the complexity of  
402 protease biology in response and resistance to immunotherapy. Moreover, the cleavage  
403 signatures of this set of substrates were not strongly correlated (correlation constants of  
404 most substrate pairs < 0.8), justifying their inclusion in our library of protease sensors  
405 (**Fig. 6c**). To enable multiplexed detection of protease activity, we labeled the chosen  
406 substrates with isobaric mass barcodes, which are isotopically labeled Glufib peptides  
407 that share the same MS1 parent mass for reporter pooling but produce unique fragmented

408 MS2 ions distinguishable by tandem mass spectrometry (MS/MS)<sup>10</sup>. After coupling  
409 individual mass-barcoded substrate to  $\alpha$ PD1 or IgG1 antibody, we prepared the 14-plex  
410 library of antibody-activity sensor conjugates by mixing either  $\alpha$ PD1 or IgG1 formulations  
411 at equimolar concentrations. LC/MS-MS analysis of the conjugate mixtures resolved the  
412 mass reporters to individual contributions, facilitating multiplexed detection of protease  
413 activity (**Supplemental Fig. S11**).

414 We next sought to perform longitudinal response assessment during ICB therapy  
415 by treating WT, B2m<sup>-/-</sup>, and Jak1<sup>-/-</sup> tumor-bearing mice with INSIGHT library of either  
416  $\alpha$ PD1 or IgG1 conjugates. To establish the diagnostic utility of our multiplexed sensors,  
417 we leveraged machine learning to build binary classifiers based on urinary reporter  
418 signals at early treatment time points that could be applied to discriminate  $\alpha$ PD1-treated  
419 from IgG1-treated WT tumors for response monitoring, or  $\alpha$ PD1-treated B2m<sup>-/-</sup> from  
420  $\alpha$ PD1-treated Jak1<sup>-/-</sup> tumors for resistance stratification. To evaluate classification  
421 robustness and minimize bias in data splitting for training and testing purpose, we split  
422 the data into training and test sets using 5-fold cross validation and repeated this  
423 procedure 100 times to obtain the average area under the ROC curve (AUC) for all test  
424 results (ref). For monitoring therapeutic response, we built random forest classifiers on  
425 urine signals from  $\alpha$ PD1-treated WT tumors (n = 25) and IgG1-treated controls (n = 15).  
426 Our classifiers differentiated treated mice from isotype-treated controls with high  
427 diagnostic accuracy as early as the second dose of treatment (AUC<sub>dose 2</sub> = 0.92, AUC<sub>dose</sub>  
428 <sub>3</sub> = 0.93) (**Fig. 6d**). When we used the classifier trained on dose 3 signals to classify based  
429 on dose 2 signals, a comparable diagnostic performance was achieved (AUC<sub>trained dose 3,</sub>  
430 <sub>tested dose 2</sub> = 0.88), indicating that the urine signatures were consistent across the two

431 doses (**Supplemental Fig. S12a**). To evaluate the contribution of individual probes to this  
432 response monitoring classification, we obtained feature importance scores from the  
433 random forest classifiers. We found a set of three probes (L2-8, L3-7, and L2-1)  
434 contributing markedly more than others in the classification performance (**Fig. 6e**). Where  
435 L2-1 monitored granzymes and specifically GzmB, L2-8 monitored matrix  
436 metalloproteases and cathepsins. This set of probes provided coverage for all three  
437 protease families differentially expressed between the two groups based on RNA data  
438 (**Fig. 5c**). To assess the utility of INSIGHT in stratifying refractory tumors based on  
439 resistance mechanisms, we next built classifiers to distinguish  $\alpha$ PD1-treated B2m<sup>-/-</sup> (n =  
440 15) from Jak1<sup>-/-</sup> tumors (n = 15). We achieved good classification performance and an  
441 increase in diagnostic accuracy when using urine signals on dose 3 as compared to dose  
442 2 (AUC<sub>dose 2</sub> = 0.77, AUC<sub>dose 3</sub> = 0.91) (**Fig. 6f, Supplemental Fig. S12b**). Moreover,  
443 feature importance analysis showed multiple probes contributing almost equally to  
444 resistance stratification, with the top 8 performing probes monitoring all 5 target protease  
445 families (**Fig. 6g**).

446 While a full set of 14 probes was used in our studies, it is possible that smaller  
447 probe sets could accurately classify ICB response or stratify resistance mechanisms,  
448 allowing customization of INSIGHT based on intended use cases. To investigate this  
449 utility, we built response monitoring classifiers using the three most important probes from  
450 the feature importance analysis. We found that these classifiers produced comparable  
451 diagnostic performance (AUC<sub>dose 2</sub> = 0.95, AUC<sub>dose 3</sub> = 0.91) to those trained on signals  
452 from the entire INSIGHT panel (**Fig. 6h, Supplemental Fig. S13a**). For resistance  
453 stratification, we built classifiers in an iterative basis by adding one probe at a time

454 following a descending order of importance. By this analysis, we found that the diagnostic  
455 AUCs reached saturated values when using the 5 probes with highest importance scores  
456 (L2-11, L2-20, L2-19, L3-16, and L2-9) to build the classifiers ( $AUC_{\text{dose } 2} = 0.80$ ,  $AUC_{\text{dose}}$   
457  $3 = 0.91$ ) (**Fig. 6h, Supplemental Fig. S13b, c**). Of note, there was no overlap between  
458 the set of response monitoring probes and resistance stratifying probes. Furthermore, by  
459 feature importance scores, the three response monitoring probes were among the least  
460 important probes for resistance stratification, and vice versa (**Fig. 6i**). The former  
461 observation indicated that probes that are important for monitoring therapeutic response  
462 are less useful for discriminating the two resistant tumors, in which there were no active  
463 anti-tumor immune responses. Overall, our results demonstrate the potential of  
464 integrating multiplexed antibody-activity sensor conjugates with machine learning for  
465 noninvasive longitudinal monitoring of response and resistance to ICB therapy.

466

467

468

469

470

471

472

473

474

## 475 **Discussion**

476           In this study, we developed antibody-activity sensor conjugates consisting of ICB  
477 antibodies decorated with protease-sensing peptides, termed INSIGHT, to monitor  
478 immune responses during treatment. Early response assessments that detect therapeutic  
479 responses and differentiate resistance mechanisms during ICB therapy have the potential  
480 to generate diagnostic insights to facilitate better treatment decisions. In mice bearing  
481 tumors that respond to ICB therapy, systemic administration of conjugates monitoring the  
482 activity of GzmB produced elevated reporter signals in urine, indicating therapeutic  
483 responses noninvasively as early as on the second dose of treatment. By analyzing the  
484 transcriptomes of ICB-treated murine tumors, we identified protease signatures of  
485 therapeutic response consistent with human data and characterized proteases  
486 associated with tumor resistance. To stratify ICB resistant tumors, we built a multiplexed  
487 library of mass barcoded antibody-sensor conjugates to detect these protease signatures  
488 and produce urine signals quantifiable by mass spectrometry. In wildtype and knockout  
489 tumor models, we demonstrated that machine learning classifiers trained on urine  
490 samples detected on-treatment responders as early as the second dose and stratified  
491 B2m loss from Jak1 loss resistance.

492           We engineered INSIGHT based on our work on synthetic biomarkers, which are  
493 composed of activity-based biomarkers that monitor dysregulated protease activities for  
494 early disease detection in bacterial infection<sup>31</sup>, thrombosis<sup>32</sup>, cancer<sup>10,11,33</sup>, and organ  
495 transplant rejection<sup>18</sup>. Previous synthetic biomarkers rely on nanoparticle or polymeric  
496 carriers to prevent rapid renal clearance of free peptides, but their utility to target specific  
497 disease sites has not been explored. INSIGHT utilizes the extended circulation half-life of

498 therapeutic antibodies while simultaneously harnessing their ability to bind to biological  
499 targets and exert therapeutic responses. Conjugation of GzmB peptide substrates to  
500  $\alpha$ PD1 antibody extended the circulation half-life of the free peptides ( $t_{1/2}$  = 3.9 hour vs.  
501 19.2 min<sup>18</sup>) without compromising antibody half-life, consistent with previous reports on  
502 the pharmacokinetics of antibody-peptide conjugates<sup>17,20</sup>. Additionally, flow analysis of  
503 TILs from murine tumors revealed that  $\alpha$ PD1-peptide conjugates can target PD1-  
504 expressing CD8+ T cells, which play central roles in anti-tumor immunity reinvigorated by  
505 ICB therapy<sup>34</sup>. As cytotoxic CD8+ T cells engage and kill tumor cells, secreted proteases  
506 by both immune and tumor cells cleave peptide substrates, releasing reporters that are  
507 remotely filtered into urine for noninvasive detection of ICB therapeutic response and  
508 resistance. In this study, we showed by multiple metrics, including ELISA, flow cytometry,  
509 and *in vivo* studies, that the conjugation of peptides via free lysine side chains did not  
510 impact target binding or therapeutic efficacy of ICB antibodies. Our technology could  
511 further benefit from site-directed bioconjugation methods, including cysteine-specific  
512 reduction, unnatural amino acid incorporation, and enzymatic approaches<sup>35</sup>, to produce  
513 more consistent formulation with well-defined peptide-to-antibody ratios, thereby  
514 improving diagnostic precision. Given that a variety of cargos including peptides have  
515 been successfully coupled to therapeutic antibodies<sup>36</sup>, we expect that this approach could  
516 be extended beyond ICB to benefit other antibody-based therapies.

517 By focusing on monitoring anti-tumor immune activity, INSIGHT demonstrated the  
518 potential to detect ICB responses that precede observable changes in tumor burden.  
519 Emerging evidence has revealed that dynamic changes in the T cell response can occur  
520 early during ICB treatment and are indicative of therapeutic outcomes<sup>22,24,37,38</sup>. In fact,

521 ICB monotherapy or combination treatments can induce changes in intratumoral<sup>24</sup> and  
522 peripheral<sup>22</sup> T cell populations after one dose of treatment (3-4 weeks) that are associated  
523 with long-term treatment response and overall survival in advanced melanoma patients.  
524 To monitor therapeutic response during ICB therapy, we endowed checkpoint antibodies  
525 with the ability to sense GzmB during cytotoxic T cell killing. In two syngeneic tumor  
526 models, administration of ICB-GzmB sensor conjugates produced elevated reporter  
527 signals in urine of responders as early as the second dose after treatment. These  
528 increases in urine signals differentiated ICB-treated responders from isotype-treated  
529 controls with high AUROCs (>0.85) before there were significant differences in tumor  
530 burden between the two groups. By contrast, when ICB treatment did not induce a  
531 therapeutic response, as in CT26 tumors treated with  $\alpha$ PD1 or  $\alpha$ CTLA4 monotherapy, we  
532 did not observe statistical differences in urine signals between treated and control groups.  
533 These observations, in addition to the correlation of urine signals to observed increases  
534 in GzmB+CD8+ TILs by flow cytometry, indicated that GzmB sensor conjugates could  
535 detect early anti-tumor T cell activity reinvigorated by ICB therapy through urinary  
536 reporters. When our technology detected the onset of T cell activity on the second dose,  
537 this response was primarily induced by the first dose of treatment, as it is unlikely that  
538 ICB treatment would induce a therapeutic response within a few hours of urine collection.  
539 INISGHT can complement standard of care assessments by radiologic imaging, which  
540 are first performed between 9 to 12 weeks (or after at least 3 to 4 ICB doses)<sup>5,39,40</sup>, by  
541 providing early diagnostic information simply by administering a bolus injection of ICB  
542 antibody-sensor conjugates.



543 Primary refractory tumors and acquired resistance remain the main drivers of  
544 patient mortality in ICB therapy<sup>3,7</sup>, motivating the need for biomarkers to identify patients  
545 with primary resistance or monitor the development of acquired resistance. Our  
546 transcriptomic analyses of  $\alpha$ PD1 therapy-resistant tumors revealed that protease  
547 signatures are markedly different between  $B2m^{-/-}$  and  $Jak1^{-/-}$  tumors, enabling a mass  
548 barcoded library of protease sensors to classify them at early treatment time points.  
549 Human tumors acquire resistance to checkpoint inhibitors by mutating important genes  
550 of the antigen presentation (e.g., B2M) or IFN $\gamma$  response (e.g., JAK1, JAK2) pathways to  
551 evade CD8 T cell-mediated tumor control<sup>7</sup>. In our study, we generated  $B2m^{-/-}$  and  $Jak1^{-/-}$   
552 tumor mouse models and validated their resistant phenotypes to  $\alpha$ PD1 therapy. Flow  
553 cytometry analysis revealed that  $\alpha$ PD1 treatments did not induce significant increases in  
554 populations of GzmB+ or antigen experienced CD8+ TILs in resistant tumors. This finding  
555 indicated that a productive GzmB-mediated T cell response was absent in both tumor  
556 types, and a single GzmB sensor was unlikely to be able to differentiate between these  
557 two primary resistance mechanisms. Although both knockout tumors were resistant to  
558  $\alpha$ PD1 monotherapy, GSEA analysis highlighted different gene set signatures of both  
559 immune- and tumor-associated pathways in treated  $B2m^{-/-}$  versus  $Jak1^{-/-}$  tumors,  
560 indicating potentially unique biological pathways that regulate the two resistant  
561 phenotypes. As proteases play fundamental roles in many immune- and tumor-  
562 associated pathways, we showed by differential expression analyses that the protease  
563 signatures were markedly different between  $B2m^{-/-}$  and  $Jak1^{-/-}$  tumors. Thus,  
564 administration of our multiplexed library of protease sensors produced urine signals that  
565 could train machine learning classifiers to differentiate these resistant phenotypes

566 (AUROCs > 0.9). For a biomarker to be clinically useful, there needs to be an  
567 improvement in outcomes for those tested positive relative to those with negative  
568 results<sup>41</sup>. Despite having high prognostic values, enumeration of circulating tumor cells  
569 (CTC) has not been widely adopted as a biomarker for several tumor types (e.g., breast,  
570 prostate, colon cancer), as detection of elevated CTC levels did not lead to increased  
571 patient survival<sup>42</sup>. In the near future when there are improvements in overall survival for  
572 patients with B2m<sup>-/-</sup> or Jak1<sup>-/-</sup> tumors, we envision that INSIGHT will allow resistance  
573 identification and classification in treatable timeframe, making it valuable as a predictive  
574 biomarker.

575

576

577

578

579

580

581

582

583

584

585

586

## 587 **Materials and Methods**

### 588 *Animals*

589 6- to 8-week old female mice were used at the outset of all experiments. Pmel (B6.Cg-  
590 Thy1a/Cy Tg(TcraTcrb)8Rest/J ) and OT1 (C57BL/6-Tg(TcraTcrb)1100Mjb/J) transgenic  
591 mice were bred in house using breeding pairs purchased from Jackson Lab. C57BL/6  
592 and BALB/c mice for tumor studies were purchased from Jackson Lab. All animal  
593 procedures were approved by Georgia Tech IACUC (protocol #KWONG-A100193).

### 594 *Antibody-peptide conjugation.*

595 FITC-labelled GzmB substrate peptides ((FITC)AIEFDSGc; lower case letters = d-form  
596 amino acids) were synthesized by Tufts University Core Facility and used for *in vivo*  
597 formulations. FITC-labelled GzmB substrate peptides with internal quencher ((5-  
598 FAM)aIEFDSGK(CPQ2)kkc) were synthesized by CPC Scientific and used for all in vitro  
599 activity assays. Peptides with isobaric mass reporters were synthesized in house using  
600 the Liberty Blue Peptide Synthesizer (CEM). Free  $\alpha$ PD1 (kind gift of Dr. Gordon Freeman,  
601 Dana-Farber) and  $\alpha$ CTLA4 (BioXCell; clone 9H10) antibodies were first reacted to the  
602 heterobifunctional crosslinker Succinimidyl Iodoacetate (SIA; Thermo, 5:1 molar ratio) for  
603 2 hours at room temperature (RT) in the dark, and excess SIA were removed by buffer  
604 exchange using Amicon spin filter (30 kDa, Millipore). Cysteine-terminated peptides were  
605 mixed with mAb-SIA (10:1 molar ratio) and reacted overnight at RT in the dark to obtain  
606 mAb-peptide conjugate. The conjugates were purified on a Superdex 200 Increase 10-  
607 300 GL column using AKTA Pure FPLC System (GE Health Care). Endotoxin was  
608 removed from the samples by phase separation with Triton X-114 (Sigma) at 2% final  
609 volume ratio (ref). Final endotoxin concentrations were quantified by Pierce LAL  
610 Chromogenic Endotoxin Assay Kit (Thermo). Protein concentrations were determined by  
611 Pierce Protein Assay Kit (Thermo). Conjugates were buffered exchanged into PBS and  
612 sterile filtered before in vivo usage. Conjugation ratios of fluorescently labeled peptides  
613 were determined by corrected absorbance measurements by NanoDrop (Thermo).  
614 Conjugation of mass-encoded peptides were validated by MALDI using Autoflex mass  
615 spectrometer (Bruker).

### 616 *PD-1 binding.*

617 Binding of  $\alpha$ PD1 conjugates to recombinant PD1 ligand was quantified using an ELISA  
618 assay developed in house, in which a high protein binding plate was coated with 1  $\mu$ g/mL  
619 of recombinant Mouse PD-1 Protein (R&D, 9047-PD-100). Binding of intact  $\alpha$ PD1-GS  
620 conjugates was quantified in a sandwich ELISA using the same PD-1 coated plate. After  
621 sample incubation,  $\alpha$ FITC mAb (Thermo, 13-7691-82; 1:800 dilution staining  
622 concentration) was used for secondary staining. ELISA development was performed  
623 according to well-established protocol (ref).

### 624 *Circulation half-life.*

625 For half-life characterization, unconjugated  $\alpha$ PD1 or  $\alpha$ PD1-GS (100 ug) was administered  
626 i.v. to naïve C57BL/6 mice (Jackson Labs). At several time points following administration,  
627 blood was collected into Capillary Tubes (VWR), and serum was isolated by  
628 centrifugation. Serum concentrations of unconjugated  $\alpha$ PD1 and  $\alpha$ PD1-GS were  
629 determined by the PD1 binding and intact PD1 ELISA respectively.

### 630 *Recombinant protease cleavage assays*

631  $\alpha$ PD1 was conjugated with GzmB peptide substrates carrying an internal CPQ2 quencher  
632 to allow cleavage detection by fluorescent measurements.  $\alpha$ PD1-GS (1.3 uM by peptide)  
633 was incubated in PBS at 37 °C with fresh mouse serum, murine Granzyme B (0.17  $\mu$ M;  
634 Peprotech), human thrombin (13.5  $\mu$ M; HaemTech), mouse thrombin (12.5  $\mu$ M;  
635 HaemTech), cathepsin B (1.5  $\mu$ M, R&D), C1r (1.43  $\mu$ M; Sigma), C1s (1.80  $\mu$ M; Sigma),  
636 MMP9 (0.1  $\mu$ M, R&D). Sample fluorescence was measured for 60 minutes using Cytation  
637 5 plate reader (Biotek).

### 638 *Sensing protease activity during T cell killing*

639 B16-F10 cells (ATCC) were cultured in DMEM supplemented with 10% FBS and 1%  
640 penicillin-streptomycin (Thermo). CD8<sup>+</sup> T cells were isolated from either OT1 or Pmel  
641 (Jackson Labs) splenocytes by MACS using CD8a Microbeads (Miltenyi). Cells were  
642 activated by seeding in 96-well plates pre-coated with anti-mouse CD3e (1  $\mu$ g/ml working  
643 concentration, Clone: 145-2C11, BD) and anti-mouse CD28 (2  $\mu$ g/ml working  
644 concentration, Clone: 37.51, BD) at  $2 \times 10^6$  cells/ml in RPMI 1640 supplemented with 10%  
645 FBS, 100U/ml penicillin-streptomycin, 1X non-essential amino acids (Gibco), 1mM  
646 sodium pyruvate, 0.05mM 2-mercaptoethanol, and 30U/ml hIL-2 (Roche). After 2 days,  
647 cells were washed and transferred to untreated culture flasks for expansion. Between day  
648 4 to 6 after activation, activated T cells were washed before coincubated with  $3 \times 10^4$  B16  
649 target cells at various T cell to effector cell ratios. After 48 hours, coculture supernatants  
650 were collected for LDH and GzmB measurements by the Pierce LDH Cytotoxicity Assay  
651 Kit (Thermo) and GzmB Mouse ELISA Kit (Thermo, BMS6029) respectively. To assess  
652 sensor activation during T cell killing, cocultured of T cells and target cells were spiked in  
653 with either  $\alpha$ PD1-GS,  $\alpha$ PD1 conjugated with control peptide (LQRIYK), and unconjugated  
654  $\alpha$ PD1. After 48 hours, fluorescence of coculture supernatant were measured using  
655 Cytation 5 plate reader (Biotek).

656

### 657 *Tumor models*

658 CT26 (ATCC), MC38 (kind gift of the NCI and Dr. Dario Vignali, University of Pittsburgh),  
659 and B2m<sup>-/-</sup> vs. Jak1<sup>-/-</sup> MC38 tumor cells were cultured in DMEM supplemented with 10%  
660 FBS and 1% penicillin-streptomycin (Thermo). Cells were grown to a good density (~70%  
661 confluence) before trypsinized for tumor inoculation. On the day of inoculation, C57BL/6  
662 and BALB/c mice were shaved and injected s.c. into the left flank with either  $1 \times 10^6$  MC38  
663 or CT26 cells respectively. Tumor burden were monitored until average tumor volume,  
664 quantified as  $0.52 \times \text{length} \times \text{width} \times \text{depth}$ , was approximately 100 mm<sup>3</sup> before initiating

665 treatment. Mice were administered with  $\alpha$ PD1 and/or  $\alpha$ CTLA4 antibody-sensor  
666 conjugates or matched isotype control (100-150 ug/injection) every 3 or 4 days.

667

#### 668 *Flow cytometry analysis of intratumoral T cells*

669 Tumor dissociation and staining for flow cytometry. Less than 1g of murine tumors were  
670 enzymatically and mechanically dissociated using Mouse Tumor Dissociation Kit  
671 (Miltenyi) and gentleMACS Dissociator (Miltenyi). TILs were then isolated from the single  
672 cell suspension using a density gradient with Percoll Centrifugation Media (GE Life  
673 Sciences) and DMEM Media (10% FBS, 1% Penstrep) at 44:56 volume ratio. TILs were  
674 counted with Trypan Blue (Thermo), and approximately  $1 \times 10^6$  viable cells per sample  
675 were stained for flow cytometry analysis. Cells were first stained for surface markers in  
676 FACS Buffer (1x DPBS, 2% FBS, 1 mM EDTA, 25 mM HEPES). Intracellular staining was  
677 performed using eBioscience Intracellular Fixation & Permeabilization Buffer Set  
678 (Thermo). All antibodies were used for staining at 1:100 dilution from stock  
679 concentrations. Stained cells were analyzed by LSRFortessa Flow Cytometer (BD).

680 Antibody clones. CD45 (30-F11), CD8 (53-6.7), CD44 (IM7), PD-1 (29F.1A12), TIM3  
681 (RMT3-23), CD4 (RM4-5), NK1.1 (PK136), CD19 (6D5), GZMB (GB12). Viability was  
682 accessed by staining with LIVE/DEAD Fixable Dye (Thermo).

683

#### 684 *Urinary detection of therapeutic response and resistance to ICB therapy*

685 At 3 hours after administration of ICB antibody-sensor conjugates, urine was collected  
686 and analyzed for noninvasive detection of therapeutic response and resistance. FITC  
687 reporters were isolated from urine samples using Dynabeads (Thermo) decorated with  
688  $\alpha$ FITC antibody (Genetex). Sample fluorescence was measured by Cytation 5 plate  
689 reader (Biotek), and reporter concentrations were determined by using a known FITC  
690 ladder. Concentrations of isobaric mass reporters were quantified by Syneous Health  
691 (Morrisville, NC) using LC-MS/MS.

692

#### 693 *Cas9 knockout of B2m and Jak1.*

694 CRISPR guide RNA's were designed to target two exons in either B2m or Jak1 in the Mus  
695 musculus GRCm38 genome. Top and bottom guide oligonucleotides were annealed  
696 using T4 PNK (NEB) and ligated into the backbone of eSpCas9\_PuroR\_GFP plasmid  
697 (Sigma) using BbsI cut sites and T7 ligase (NEB).  $1 \times 10^5$  MC38 cells were transfected  
698 with gRNA-ligated eSpCas9 plasmids for 48 hours using TransIT-LT1 transfection  
699 reagent (Mirus Bio) in Opti-MEM (Thermo Fisher) and cultured for 3 passages in DMEM  
700 supplemented with 10% FBS and 1% penicillin-streptomycin (D10). Selection of  
701 transfected cells were done by supplementing culture media with 2 ug/mL puromycin  
702 (Thermo Fisher). Cells incubated with B2m-directed guides were stained with anti-mouse  
703 H-2Kb (clone AF6-88.5). H-2Kb-negative GFP-positive cells were sorted into single cells  
704 on a 96-well plate using FACSaria Fusion (BD Biosciences) and cultured for 2-3 weeks

705 in D10. For cells incubated with Jak1-directed guides, GFP-positive cells were sorted into  
706 single cells and cultured for 2-3 weeks in D10. Clones that passed the functional assays  
707 for successful deletion of B2m or Jak1 are selected for tumor studies.

708

709 *In vitro validation.*

710 DNA was isolated from single-cell WT and knockout clones, and a PCR reaction was  
711 done to amplify the edited regions within B2m and Jak1 exons. The PCR products were  
712 sequenced by Sanger sequencing, and sequencing results were analyzed with TIDE  
713 (Tracking of Indels by Decomposition) analysis (ref) to confirm knockout efficiency. WT  
714 and knockout tumor cells were stained for H2-Kb (clone AF6-88.5) to confirm the  
715 functional loss of B2m. WT and B2m<sup>-/-</sup> were pulsed with SIINFEKL (30 uM peptide  
716 concentration), washed, and coincubated with plate-activated OT1 T cells at 5:1 ratio of  
717 effector:target cell. After overnight incubation, cells were washed and stained for CD8  
718 (53-6.7), IFN $\gamma$  (XMG1.2), and GzmB (GB12). For IFN $\gamma$  stimulation assay, WT and  
719 knockout tumor cells were incubated with recombinant murine IFN $\gamma$  (Peprotech; 500  
720 EU/mL) for 2 days and stained for surface expression of H2-Kb (AF6-88.5) and PD-L1  
721 (10F.9G2).

722

723 *Tumor RNA isolation and sequencing.*

724 Mice bearing WT, B2m<sup>-/-</sup>, Jak1<sup>-/-</sup> MC38 tumors were treated with either  $\alpha$ PD1 or IgG1  
725 (100 ug) every 3 or 4 days. After the third administration, approximately 50 mg of tumors  
726 were dissected and rapidly frozen with dry ice and IPA. Frozen tumor samples were  
727 homogenized in MACS M Tubes (Miltenyi) using the MACS Dissociator (Miltenyi). Total  
728 RNA was isolated from the homogenate using the RNeasy Plus Mini Kit (Qiagen). Library  
729 preparation with TruSeq RNA Library Prep Kit (Illumina) and mRNA NSG sequencing  
730 (40x10<sup>6</sup> paired end read) were performed by Admera Health (South Plainfield, NJ).

731

732 *RNA-seq data mapping and visualization.*

733 Raw FASTQ reads passing quality control (FastQC v0.11.2) were aligned on the mm10  
734 reference genome using STAR aligner (v2.5.2a) with default parameters. Aligned  
735 fragments were then counted and annotated using Rsamtools (v3.2) and Cufflinks  
736 (v.2.2.1) after a 'dedup' step using BamUtils (v1.0.11). t-SNE embedding results were  
737 performed in sklearn (v0.23.1) using all murine genes. Heat maps were plotted with  
738 seaborn's (v.0.9.0) clustermap function. Rows were gaussian normalized, and the  
739 dendrograms shown for clustering come from hierarchical clustering using Euclidean  
740 distance as a metric.

741

742 *Differential expression and gene set enrichment analysis.*

743 Differential expression was performed using the edgeR package (v3.24.3) in R using the  
744 exactTest method with tagwise dispersion. For mouse data, TMM normalization  
745 considering mice in all treatment groups was performed to remove library size effect



746 through the calcNormFactors function. For human data<sup>24</sup>, TMM normalization was  
747 performed using the two groups being compared. For both datasets, differential  
748 expression was performed on Ensembl IDs before mapping to gene names. Then the  
749 identified differentially expressed genes were filtered by a list of extracellular and  
750 transmembrane endopeptidases queried from UniProt. Gene set enrichment analysis  
751 (GSEA) was performed using the fgsea package (v1.8.0) in R. To rank genes, differential  
752 expression analysis was first performed on the entire gene set. Genes are then ranked  
753 by  $-\text{sign}(\log\text{FC}) \cdot \log(\text{pval})$ . Hallmark gene sets (MSigDB) were used for all GSEA  
754 analyses.

755

#### 756 *Peptide substrate synthesis.*

757 To optimize peptide substrates for target proteases, a library of potential substrates  
758 flanked by 5FAM fluorescent dye and DABCYL quencher (5FAM-substrate-  
759 Lys{DABCYL}-Amide) was synthesized by Genscript or manufactured in-house using  
760 Liberty Blue peptide synthesizer (CEM). The peptide synthesis scale used was 0.025 mM,  
761 and Low-loading rink amide resin (CEM) was used. Amino acids (Chem-Impex) were  
762 resuspended in DMF (0.08 M), as were all synthesis buffers. Activator buffer used was  
763 Diisopropylcarbodiimide (DIC; Sigma) (0.25 M) and the activator base buffer was Oxyma  
764 (0.25 M; CEM) while the deprotection buffer was Piperidine (20%; Sigma) supplemented  
765 with Oxyma (0.1 M). Crude peptides were purified on 1260 Infinity II HPLC system  
766 (Agilent) until a purity of 80% was achieved. Peptide mass and purity were validated by  
767 LC/MS (Agilent) and Autoflex TOF mass spectrometer (Bruker).

768

#### 769 *Protease substrate library optimization.*

770 Fluorescently quenched peptide substrates (10  $\mu\text{M}$ ) were incubated in manufacturer-  
771 recommended buffers at 37°C with recombinant proteases (25 nM). Our set of human  
772 recombinant proteases included Granzyme A, Granzyme B, MMP1, MMP3, MMP7,  
773 MMP9, MMP13, Caspase 1, Caspase 3, Cathepsin G, Cathepsin S (Enzo), human  
774 thrombin, human Factor XIa (HaemTech), C1R, Fibroblast Activation Protein alpha/FAP,  
775 t-Plasminogen Activator/tPA Protein, and u-Plasminogen Activator/Urokinase (R&D  
776 systems). Sample fluorescence (Ex/Em = 488 nm/525 nm) were measured for 180  
777 minutes using Cytation 5 plate reader (Biotek). Enzyme cleavage rates were quantified  
778 as relative fluorescence increase over time normalized to fluorescence before addition of  
779 protease. Hierarchical clustering was performed in python, using log<sub>2</sub> fluorescence fold  
780 change at 60 minutes. A positive cleavage event was defined as having fluorescence  
781 signal more than 2-fold above background. Correlation analysis with Spearman  
782 coefficient was done on the cleavage patterns of all peptide substrates for selection of 14  
783 substrates for library construction. These peptide substrates were paired with isobaric  
784 mass reporters based on the GluFib peptide (Table 1) and synthesized using Liberty Blue  
785 peptide synthesizer (CEM).

786

#### 787 *Urinary differentiation of ICB resistant mechanisms.*

788 Random forest was used to train classifiers based on urinary reporter signals that  
789 differentiate therapeutic response and stratify resistant mechanisms. Response  
790 monitoring classifiers were trained on reporter concentration whereas resistance  
791 stratifying classifiers were trained on mean normalized reporter concentration. All urine  
792 signals were normalized on a per mouse basis by signals on the first dose to performed  
793 paired sample analyses. For each classification task, we used five-fold cross validation  
794 by randomly left out 1/5<sup>th</sup> samples as the test set and used the remaining samples as  
795 training sets. This process was repeated 100 times, and the final performance was  
796 generated as the average area under the ROC curve (AUROC) for all train-test results.

797

#### 798 *Software and Statistical Analysis*

799 Graphs were plotted and appropriate statistical analyses were conducted using  
800 GraphPad Prism (\*P < 0.05, \*\*P < 0.01, \*\*\*P < 0.001, \*\*\*\*P < 0.0001; central values  
801 depict the means, and error bars depict s.e.m.). Flow cytometry data were analyzed  
802 using FlowJo X (FlowJo, LLC). Power analyses were performed using G\*Power 3.1  
803 (HHUD).

#### 804 *Data availability*

805 All data supporting the findings of this study are available in the manuscript and its  
806 Supplementary Information. Requests for raw data can be addressed to the  
807 corresponding authors.

808

809

810

811

812

813

814

815

816

817



818 **References**

- 819 1. Ribas, A. & Wolchok, J. D. Cancer immunotherapy using checkpoint blockade.  
820 *Science* **359**, 1350–1355 (2018).
- 821 2. Sharma, P. & Allison, J. P. The future of immune checkpoint therapy. *Science* **348**,  
822 56–61 (2015).
- 823 3. Sharma, P., Hu-Lieskovan, S., Wargo, J. A. & Ribas, A. Primary, Adaptive, and  
824 Acquired Resistance to Cancer Immunotherapy. *Cell* **168**, 707–723 (2017).
- 825 4. Nishino, M., Ramaiya, N. H., Hatabu, H. & Hodi, F. S. Monitoring immune-  
826 checkpoint blockade: response evaluation and biomarker development. *Nat. Rev.*  
827 *Clin. Oncol.* **14**, 655–668 (2017).
- 828 5. Wolchok, J. D. *et al.* Guidelines for the Evaluation of Immune Therapy Activity in  
829 Solid Tumors: Immune-Related Response Criteria. *Clin. Cancer Res.* **15**, 7412–  
830 7420 (2009).
- 831 6. Bruni, D., Angell, H. K. & Galon, J. The immune contexture and Immunoscore in  
832 cancer prognosis and therapeutic efficacy. *Nat. Rev. Cancer* 1–19 (2020)  
833 doi:10.1038/s41568-020-0285-7.
- 834 7. Kalbasi, A. & Ribas, A. Tumour-intrinsic resistance to immune checkpoint blockade.  
835 *Nat. Rev. Immunol.* 1–15 (2019) doi:10.1038/s41577-019-0218-4.
- 836 8. Kessenbrock, K., Plaks, V. & Werb, Z. Matrix Metalloproteinases: Regulators of the  
837 Tumor Microenvironment. *Cell* **141**, 52–67 (2010).
- 838 9. Martínez-Lostao, L., Anel, A. & Pardo, J. How Do Cytotoxic Lymphocytes Kill  
839 Cancer Cells? *Clin. Cancer Res.* **21**, 5047–5056 (2015).

- 840 10. Kwong, G. A. *et al.* Mass-encoded synthetic biomarkers for multiplexed urinary  
841 monitoring of disease. *Nat. Biotechnol.* **31**, 63–70 (2013).
- 842 11. Dudani, J. S., Ibrahim, M., Kirkpatrick, J., Warren, A. D. & Bhatia, S. N.  
843 Classification of prostate cancer using a protease activity nanosensor library. *Proc.*  
844 *Natl. Acad. Sci. U. S. A.* **115**, 8954–8959 (2018).
- 845 12. Whitley, M. J. *et al.* A mouse-human phase 1 co-clinical trial of a protease-activated  
846 fluorescent probe for imaging cancer. *Sci. Transl. Med.* **8**, 320ra4-320ra4 (2016).
- 847 13. Rooney, M. S., Shukla, S. A., Wu, C. J., Getz, G. & Hacohen, N. Molecular and  
848 genetic properties of tumors associated with local immune cytolytic activity. *Cell* **160**,  
849 48–61 (2015).
- 850 14. Larimer, B. M. *et al.* Granzyme B PET Imaging as a Predictive Biomarker of  
851 Immunotherapy Response. *Cancer Res.* **77**, 2318–2327 (2017).
- 852 15. LaSalle, T. *et al.* Granzyme B PET imaging of immune-mediated tumor killing as a  
853 tool for understanding immunotherapy response. *J. Immunother. Cancer* **8**, e000291  
854 (2020).
- 855 16. Allen, E. M. V. *et al.* Genomic correlates of response to CTLA-4 blockade in  
856 metastatic melanoma. *Science* **350**, 207–211 (2015).
- 857 17. Desnoyers, L. R. *et al.* Tumor-Specific Activation of an EGFR-Targeting Probody  
858 Enhances Therapeutic Index. *Sci. Transl. Med.* **5**, 207ra144-207ra144 (2013).
- 859 18. Mac, Q. D. *et al.* Non-invasive early detection of acute transplant rejection via  
860 nanosensors of granzyme B activity. *Nat. Biomed. Eng.* **3**, 281–291 (2019).
- 861 19. Efremova, M. *et al.* Targeting immune checkpoints potentiates immunoediting and  
862 changes the dynamics of tumor evolution. *Nat. Commun.* **9**, 32 (2018).

- 863 20. Strohl, W. R. Fusion Proteins for Half-Life Extension of Biologics as a Strategy to  
864 Make Biobetters. *BioDrugs* **29**, 215–239 (2015).
- 865 21. Hu, Q. *et al.* Conjugation of haematopoietic stem cells and platelets decorated with  
866 anti-PD-1 antibodies augments anti-leukaemia efficacy. *Nat. Biomed. Eng.* **2**, 831–  
867 840 (2018).
- 868 22. Boland, G. M. & Flaherty, K. T. Tracking early response to immunotherapy. *Nat.*  
869 *Cancer* **1**, 160–162 (2020).
- 870 23. Sabio, E. & Chan, T. A. The good, the bad, and the ugly: hyperprogression in cancer  
871 patients following immune checkpoint therapy. *Genome Med.* **11**, (2019).
- 872 24. Riaz, N. *et al.* Tumor and Microenvironment Evolution during Immunotherapy with  
873 Nivolumab. *Cell* **171**, 934-949.e16 (2017).
- 874 25. Duraiswamy, J., Kaluza, K. M., Freeman, G. J. & Coukos, G. Dual Blockade of PD-1  
875 and CTLA-4 Combined with Tumor Vaccine Effectively Restores T-Cell Rejection  
876 Function in Tumors. *Cancer Res.* **73**, 3591–3603 (2013).
- 877 26. Selby, M. J. *et al.* Preclinical Development of Ipilimumab and Nivolumab  
878 Combination Immunotherapy: Mouse Tumor Models, In Vitro Functional Studies,  
879 and Cynomolgus Macaque Toxicology. *PLOS ONE* **11**, e0161779 (2016).
- 880 27. Brinkman, E. K., Chen, T., Amendola, M. & van Steensel, B. Easy quantitative  
881 assessment of genome editing by sequence trace decomposition. *Nucleic Acids*  
882 *Res.* **42**, e168–e168 (2014).
- 883 28. Zaidi, M. R. The Interferon-Gamma Paradox in Cancer. *J. Interferon Cytokine Res.*  
884 **39**, 30–38 (2018).

- 885 29. Liberzon, A. *et al.* The Molecular Signatures Database Hallmark Gene Set  
886 Collection. *Cell Syst.* **1**, 417–425 (2015).
- 887 30. Dudani, J. S., Warren, A. D. & Bhatia, S. N. Harnessing Protease Activity to Improve  
888 Cancer Care. *Annu. Rev. Cancer Biol.* **2**, 353–376 (2018).
- 889 31. Buss, C. G., Dudani, J. S., Akana, R. T. K., Fleming, H. E. & Bhatia, S. N. Protease  
890 activity sensors noninvasively classify bacterial infections and antibiotic responses.  
891 *EBioMedicine* **38**, 248–256 (2018).
- 892 32. Lin, K. Y., Kwong, G. A., Warren, A. D., Wood, D. K. & Bhatia, S. N. Nanoparticles  
893 That Sense Thrombin Activity As Synthetic Urinary Biomarkers of Thrombosis. *ACS*  
894 *Nano* **7**, 9001–9009 (2013).
- 895 33. Kirkpatrick, J. D. *et al.* Urinary detection of lung cancer in mice via noninvasive  
896 pulmonary protease profiling. *Sci. Transl. Med.* **12**, (2020).
- 897 34. Waldman, A. D., Fritz, J. M. & Lenardo, M. J. A guide to cancer immunotherapy:  
898 from T cell basic science to clinical practice. *Nat. Rev. Immunol.* 1–18 (2020)  
899 doi:10.1038/s41577-020-0306-5.
- 900 35. Stephanopoulos, N. & Francis, M. B. Choosing an effective protein bioconjugation  
901 strategy. *Nat. Chem. Biol.* **7**, 876–884 (2011).
- 902 36. Khongorzul, P., Ling, C. J., Khan, F. U., Ihsan, A. U. & Zhang, J. Antibody–Drug  
903 Conjugates: A Comprehensive Review. *Mol. Cancer Res.* **18**, 3–19 (2020).
- 904 37. Galvani, E. *et al.* Stroma remodeling and reduced cell division define durable  
905 response to PD-1 blockade in melanoma. *Nat. Commun.* **11**, 853 (2020).
- 906 38. Havel, J. J., Chowell, D. & Chan, T. A. The evolving landscape of biomarkers for  
907 checkpoint inhibitor immunotherapy. *Nat. Rev. Cancer* **19**, 133–150 (2019).

- 908 39. Robert, C. *et al.* Pembrolizumab versus Ipilimumab in Advanced Melanoma. *N.*  
909 *Engl. J. Med.* **372**, 2521–2532 (2015).
- 910 40. Khoja, L., Butler, M. O., Kang, S. P., Ebbinghaus, S. & Joshua, A. M.  
911 Pembrolizumab. *J. Immunother. Cancer* **3**, 36 (2015).
- 912 41. Hayes, D. F. Biomarker validation and testing. *Mol. Oncol.* **9**, 960–966 (2015).
- 913 42. Riethdorf, S., O’Flaherty, L., Hille, C. & Pantel, K. Clinical applications of the  
914 CellSearch platform in cancer patients. *Adv. Drug Deliv. Rev.* **125**, 102–121 (2018).
- 915
- 916
- 917
- 918
- 919
- 920
- 921
- 922
- 923
- 924
- 925
- 926
- 927
- 928

929 **Figures**

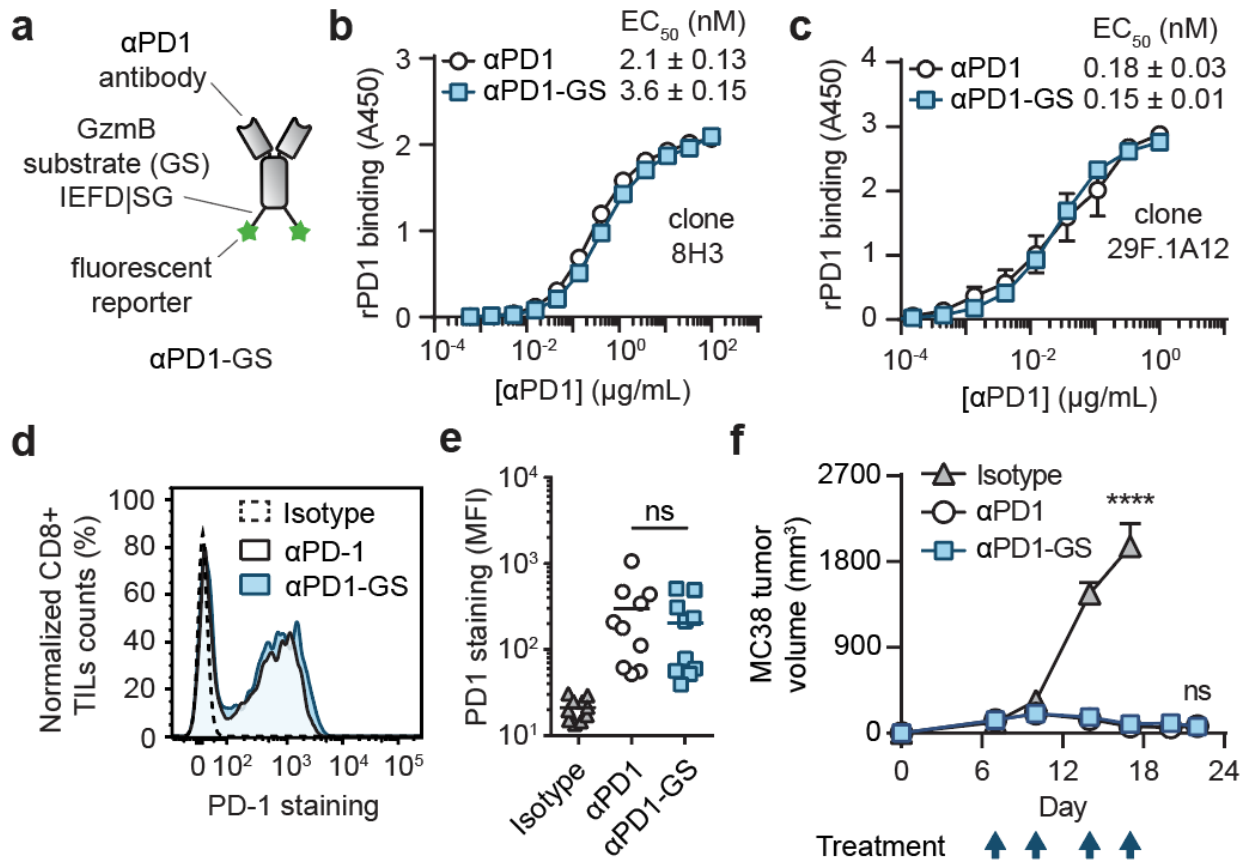

930

931 **Figure 1 | Antibody binding and therapeutic efficacy are unaffected by peptide**

932 **conjugation.** **a**,  $\alpha$ PD1-GzmB sensor conjugates ( $\alpha$ PD1-GS) consists of  $\alpha$ PD1

933 therapeutic antibody decorated with reporter-labeled GzmB peptide substrates (GS; AA

934 sequence: IEFDSG). **b**, ELISA assays comparing binding affinity of  $\alpha$ PD1-GS with

935 unconjugated  $\alpha$ PD1 using the mouse  $\alpha$ PD1 clone 8H3 (log(agonist) vs. normalized

936 response fitting function,  $n = 3$ ). **c**, ELISA assays comparing binding affinity of  $\alpha$ PD1-GS

937 with unconjugated  $\alpha$ PD1 using the rat  $\alpha$ PD1 clone 29F.1A12 (log(agonist) vs. normalized

938 response fitting function,  $n = 3$ ). **d**, Flow cytometry histogram showing PD-1 expression

939 of CD8+ TILs isolated from MC38 tumors. The same sample was divided and stained with

940 either  $\alpha$ PD1-GS,  $\alpha$ PD1, or IgG1 isotype control. **e**, Quantified plot of PD-1 expression

941 showing the median fluorescence intensity (MFI) of samples stained with either  $\alpha$ PD1-  
942 GS,  $\alpha$ PD1, or IgG1 isotype control (one-way ANOVA with Turkey's post-test and  
943 correction for multiple comparisons, ns = not significant, n = 10). **f**, Tumor growth curves  
944 of MC38 tumors treated with  $\alpha$ PD1-GS,  $\alpha$ PD1, or IgG1 isotype control (two-way ANOVA  
945 with Turkey's post-test and correction for multiple comparison, \*\*\*\*P < 0.0001, n = 6).

946

947

948

949

950

951

952

953

954

955

956

957

958

959

960

961

962

963

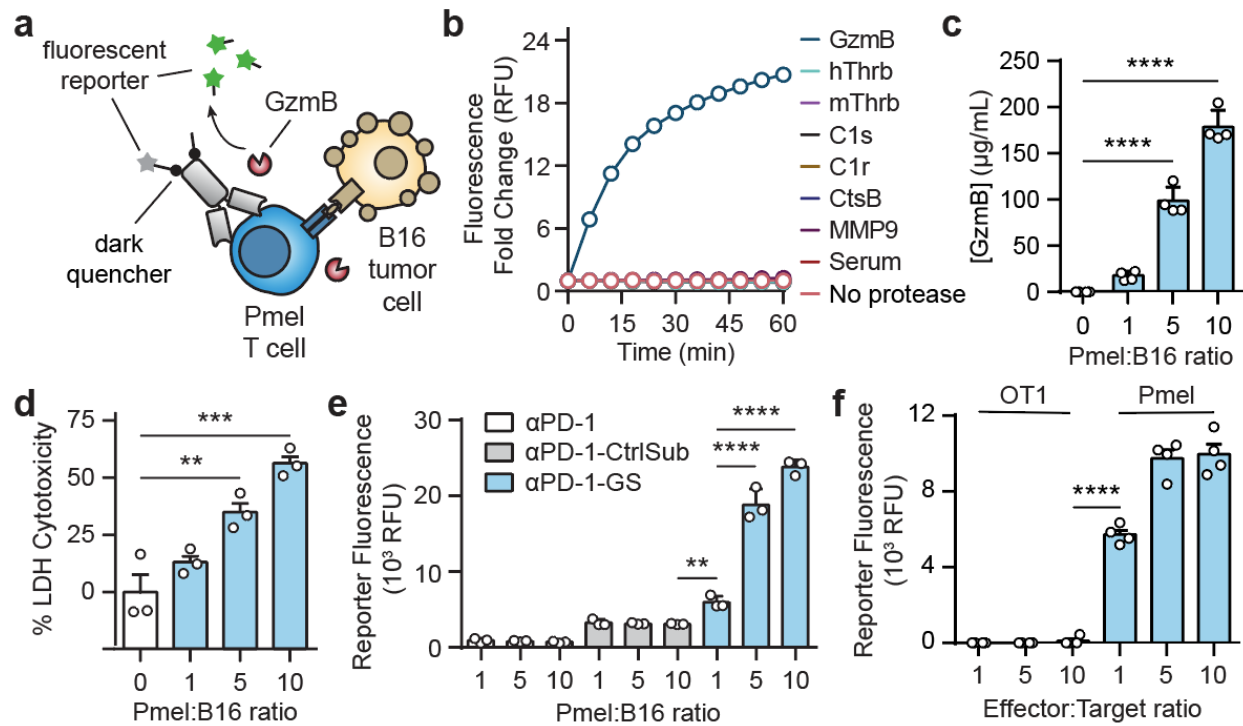

964

965 **Figure 2 | Sensing T cell killing of tumor cells by antibody-GzmB sensor**

966 **conjugates. a**, αPD1 antibody was conjugated with fluorescently-quenched peptide

967 substrates for GzmB. Upon incubating these conjugates with transgenic Pmel T cells and

968 B16 tumor cells, secreted GzmB cleaved peptide substrates, separating the fluorescent

969 reporter from the internal quencher, resulting in an increase in sample fluorescence. **b**, *In*

970 *vitro* protease cleavage assays showing normalized fluorescence of αPD1-GS after

971 incubation with recombinant GzmB (blue), mouse serum (red), and other bystander

972 proteases (n = 3). **c**, ELISA quantification of GzmB from T cell killing assays in which

973 Pmel T cells were incubated with B16 target cells at different T cell to target cell ratios

974 (one-way ANOVA with Dunnett's post-test and correction for multiple comparisons, \*\*\*\*P

975 < 0.0001, n = 4). **d**, Bar plot quantifying percent of cell cytotoxicity as measured by LDH

976 assay from cocultures of Pmel T cells with B16 target cells (one-way ANOVA with

977 Dunnett's post-test and correction for multiple comparisons, \*\*\*P < 0.001, n = 3). **e**,



978 Activity assays showing sample fluorescence after incubating  $\alpha$ PD1-GS,  $\alpha$ PD1, and an  
979  $\alpha$ PD1 conjugate with control substrates ( $\alpha$ PD1-CtrlSub) with cocultures of Pmel T cells  
980 with B16 target cells (two-way ANOVA with Turkey's post test and correction for multiple  
981 comparisons, \*\*\*\*P < 0.0001, n = 3). f, Activity assays showing sample fluorescence after  
982 incubating  $\alpha$ PD1-GS with cocultures of Pmel or OT1 transgenic T cells with B16 target  
983 cells (two-way ANOVA with Turkey's post test and correction for multiple comparisons,  
984 \*\*\*\*P < 0.0001, n = 3).

985

986

987

988

989

990

991

992

993

994

995

996

997

998

999

1000

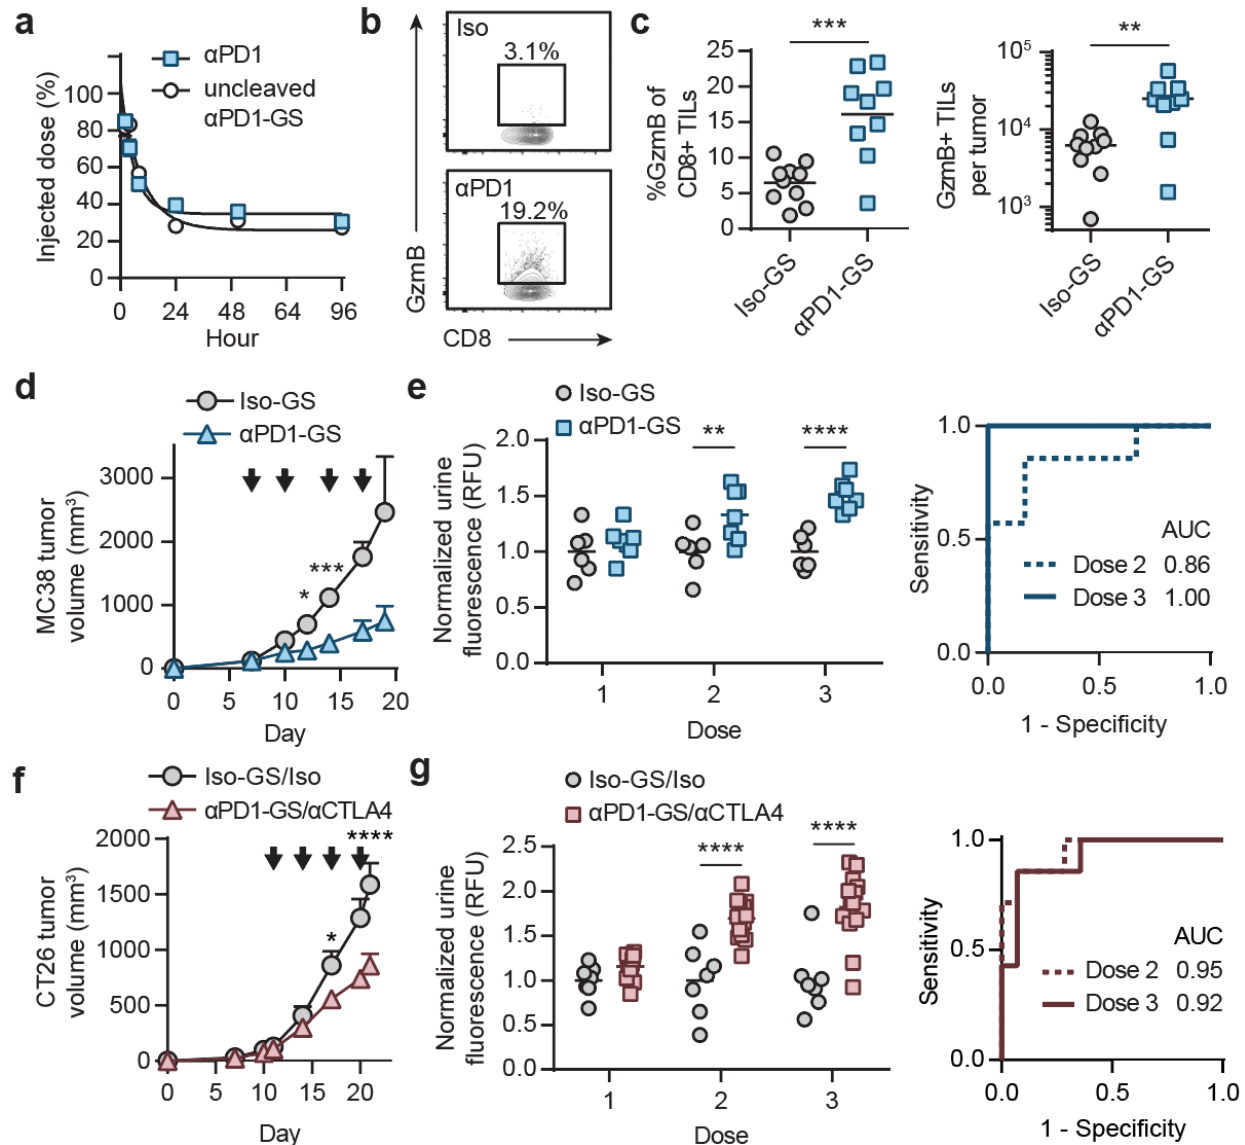

1001

1002 **Fig 3 | Urinary detection of ICB therapeutic response by administration of antibody-**

1003 **GzmB sensor conjugates.** **a**, Half-life measurements of intact αPD1-GS and

1004 unconjugated αPD1 antibody (one phase decay fitting function, n = 3). **b**, Flow cytometry

1005 plots showing intracellular GzmB expression of CD8+ TILs from MC38 tumors treated

1006 with either αPD1-GS or IgG1 isotype antibody conjugated with the GzmB peptide

1007 substrates (Iso-GS). **c**, Quantified plots showing percentages of GzmB+ cells within the

1008 CD8+ TILs or the numbers of GzmB+CD8+ TILs that were isolated from MC38 tumors

1009 treated with either αPD1-GS or Iso-GS (two-sided Student's t-test, n = 9-10). **d**, Tumor

1010 growth curves of MC38 tumor bearing mice treated with either  $\alpha$ PD1-GS or Iso-GS (two-  
1011 way ANOVA with Sidak's post test and correction for multiple comparisons, \*\*\*P < 0.001,  
1012 n = 6-7). Black arrows denote the treatment time points. **e**, Left: normalized urine  
1013 fluorescence of mice with MC38 tumors after each administration of  $\alpha$ PD1-GS or Iso-GS  
1014 (two-way ANOVA with Sidak's post test and correction for multiple comparisons, \*\*\*\*P <  
1015 0.0001, n = 6-7). Right: receiver-operating-characteristic (ROC) analysis showing the  
1016 diagnostic specificity and sensitivity of  $\alpha$ PD1-GS in differentiating between responders to  
1017  $\alpha$ PD1 monotherapy from off-treatment controls using urine signals on the second (AUC  
1018 = 0.857, 95% CI = 0.643-1.071) or the third dose (AUC = 1.00, 95% CI = 1.00-1.00). **f**,  
1019 Tumor growth curves of CT26 tumor bearing mice treated with combination therapy of  
1020  $\alpha$ PD1-GS and  $\alpha$ CTLA4 or combination of matched isotype controls (two-way ANOVA with  
1021 Sidak's post test and correction for multiple comparisons, \*\*\*\*P < 0.0001, n = 7-14). Black  
1022 arrows denote the treatment time points. **g**, Left: normalized urine fluorescence of mice  
1023 with CT26 tumors after each administration of  $\alpha$ PD1-GS and  $\alpha$ CTLA4 or matched isotype  
1024 controls (two-way ANOVA with Sidak's post test and correction for multiple comparisons,  
1025 \*\*\*\*P < 0.0001, n = 7-14). Right: receiver-operating-characteristic (ROC) analysis  
1026 showing the diagnostic specificity and sensitivity of  $\alpha$ PD1-GS in differentiating between  
1027 responders to ICB combination therapy from off-treatment controls using urine signals on  
1028 the second (AUC = 0.949, 95% CI = 0.856-1.042) or the third dose (AUC = 0.92, 95% CI  
1029 = 0.795-1.042)

1030

1031

1032

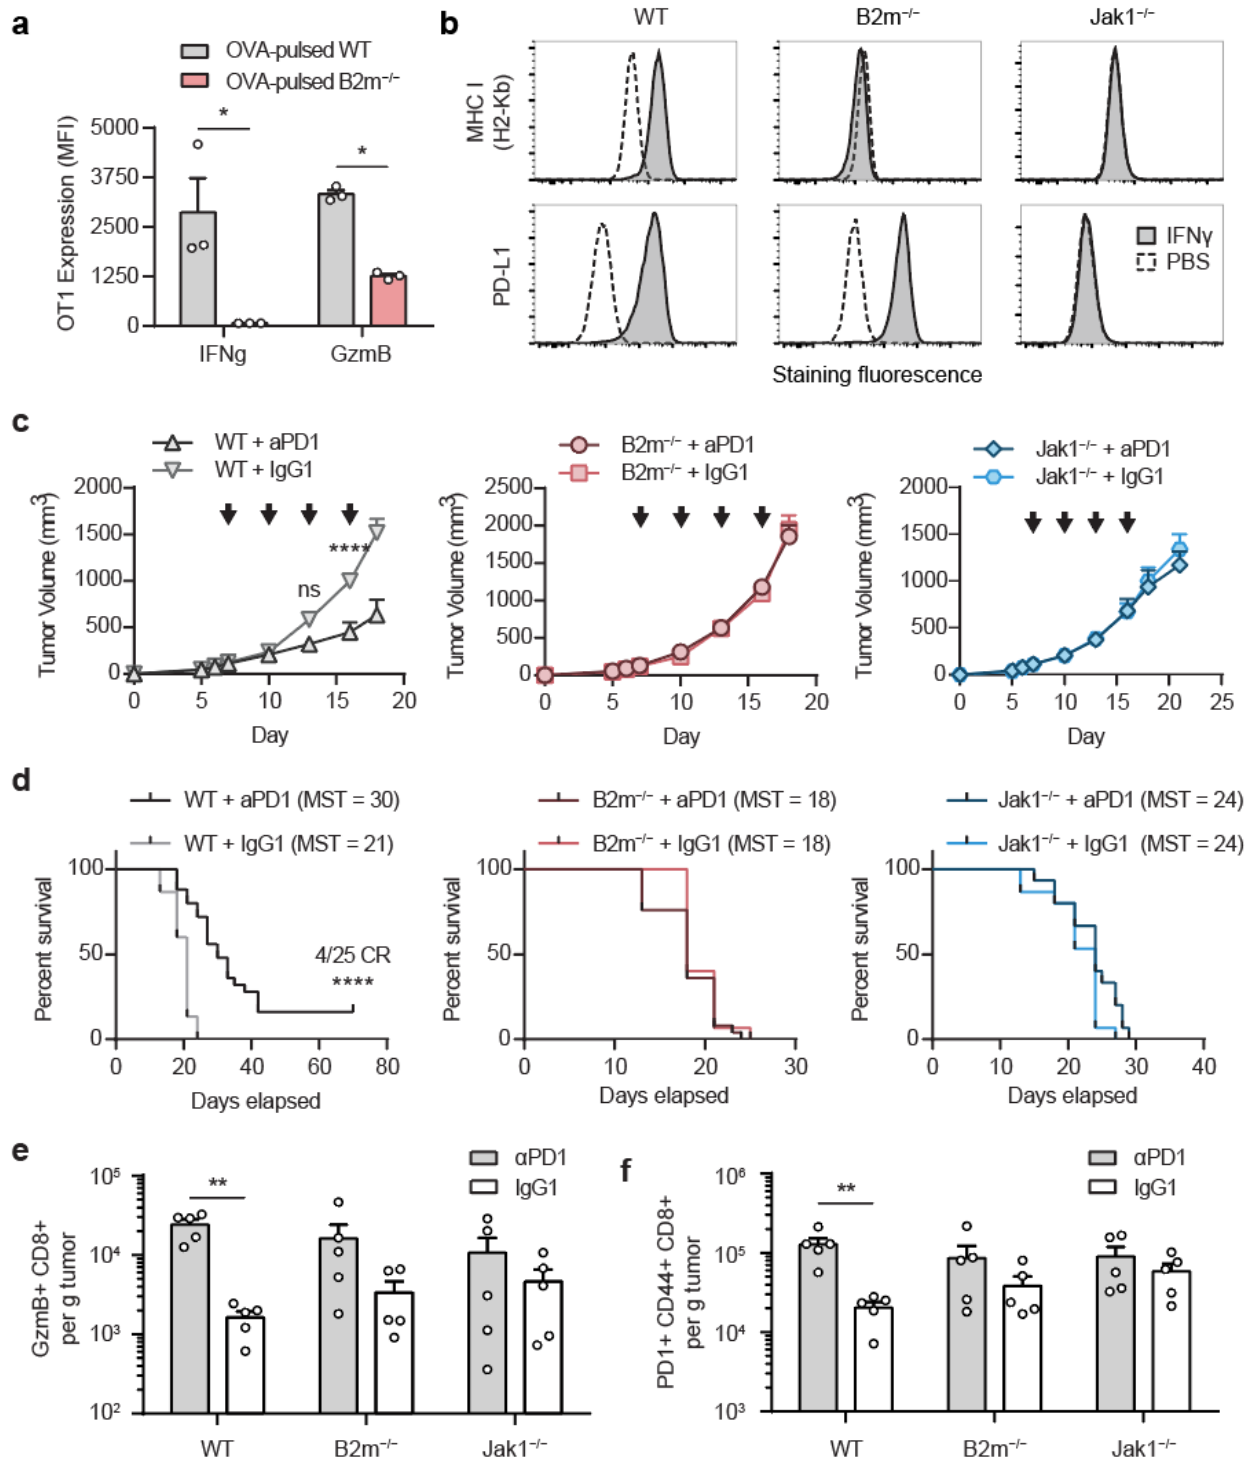

1033

1034 **Figure 4 | Loss of function mutations in B2m and Jak1 rendered MC38 tumors**

1035 **resistant to  $\alpha$ PD1 monotherapy.** **a**, Bar plots showing median fluorescence intensity

1036 (MFI) of T cell effector molecules IFN $\gamma$  and GzmB expressed by OT1 transgenic T cells

1037 in cocultures with wildtype (WT) or B2m<sup>-/-</sup> MC38 tumor cells pulsed with the cognate  
1038 antigen ovalbumin (OVA) (two-tailed Student's t-test, n = 3). **b**, Flow cytometry histograms  
1039 showing expression of MHC-I (H2-Kb) and PD-L1 on the surface of WT, B2m<sup>-/-</sup>, and  
1040 Jak1<sup>-/-</sup> MC38 tumor cells upon stimulation with either IFN $\gamma$  or PBS. **c**, Tumor growth  
1041 curves of mice bearing WT (left), B2m<sup>-/-</sup> (middle), or Jak1<sup>-/-</sup>(right) MC38 tumor treated  
1042 with  $\alpha$ PD1 or matched IgG1 control (two-way ANOVA with Sidak's post test and correction  
1043 for multiple comparisons, \*\*\*\*P < 0.0001, n = 15-25). Black arrows denote the treatment  
1044 time points. **d**, Survival curves of mice bearing WT (left), B2m<sup>-/-</sup> (middle), or Jak1<sup>-/-</sup>(right)  
1045 MC38 tumor treated with  $\alpha$ PD1 or matched isotype control (Log-rank (Mantel-Cox) test,  
1046 n = 15-25). **e, f**, Quantified plots of flow cytometry data showing the number of GzmB+  
1047 CD8+ TILs or PD1+ CD44+ CD8+ TILs per 1 gram of tumors from mice bearing WT,  
1048 B2m<sup>-/-</sup>, or Jak1<sup>-/-</sup> MC38 tumor treated with  $\alpha$ PD1 or matched isotype control (two-way  
1049 ANOVA with Sidak's post test and correction for multiple comparison, \*\*P < 0.01, n = 5).

1050

1051

1052

1053

1054

1055

1056

1057

1058

1059

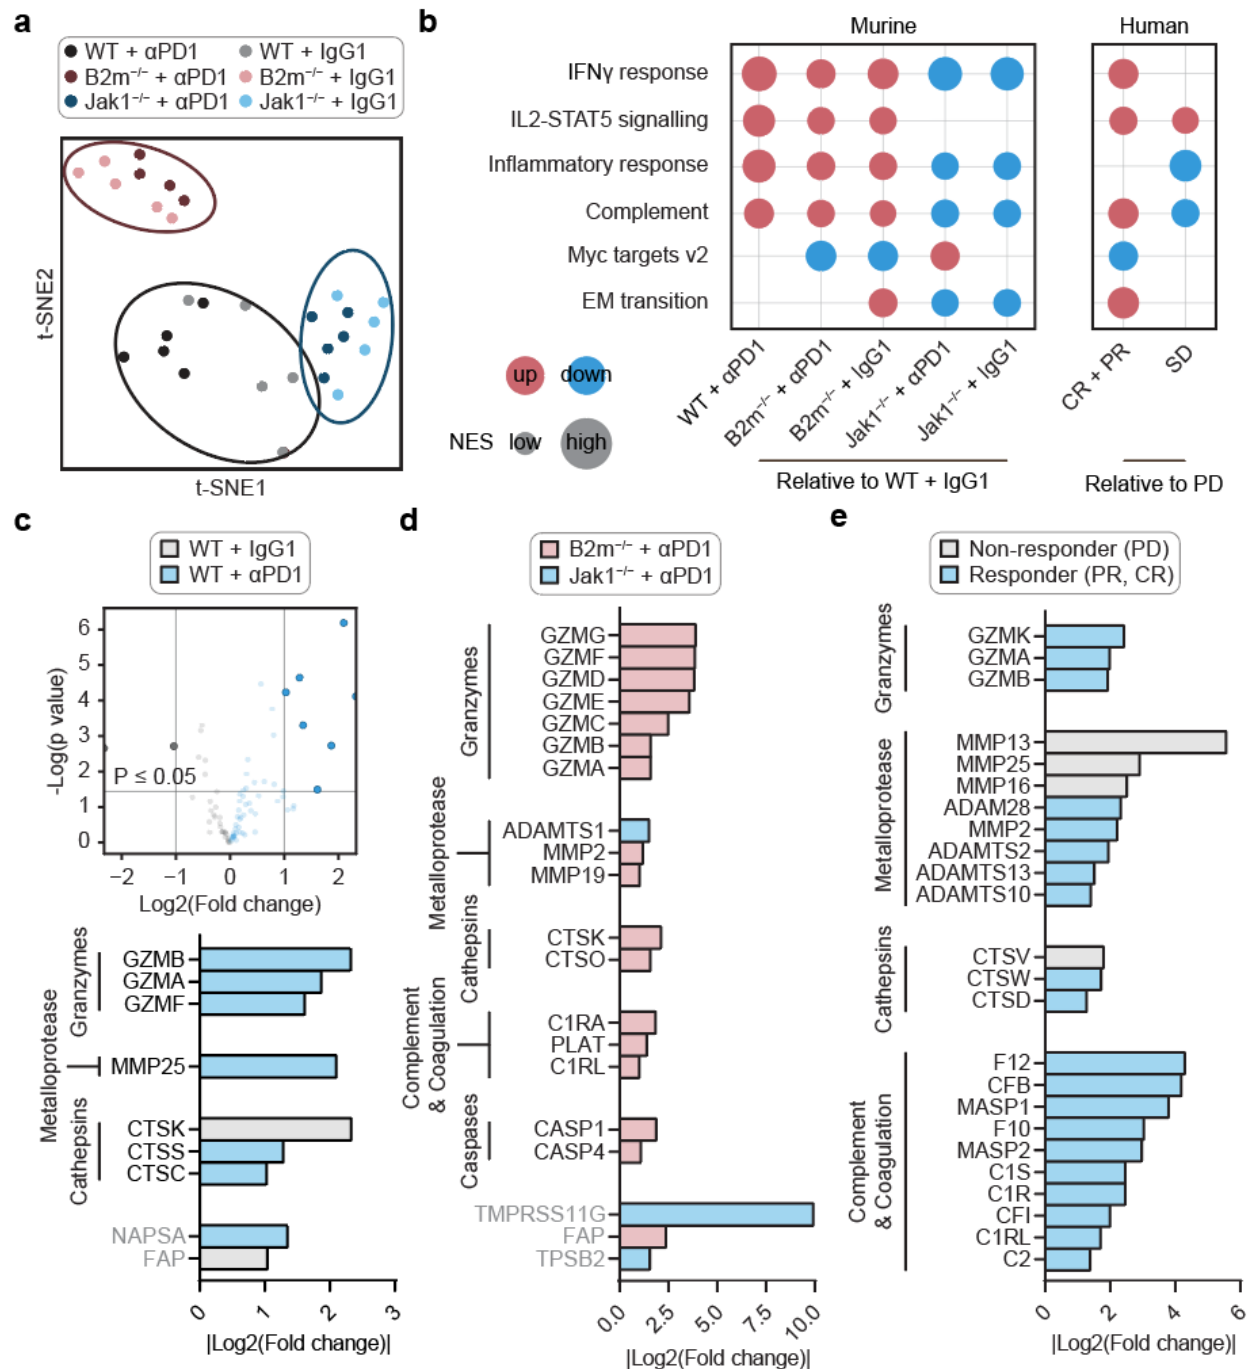

1060

1061 **Figure 5 | Proteases are differentially regulated in ICB response and resistance. a,**  
 1062 **t-SNE plot showing global transcriptional profiles of WT, B2m<sup>-/-</sup>, and Jak1<sup>-/-</sup> MC38 tumors**  
 1063 **treated with  $\alpha$ PD1 or IgG1 isotype control (n = 5). b, Left: GSEA comparing gene set**  
 1064 **signatures of all mouse tumors and treatment groups relative to WT tumors receiving**

1065 isotype control treatment (n = 5). 6 gene sets were shown from the canonical Hallmark  
1066 gene sets<sup>29</sup>, with 4 immune- and 2 tumor-associated gene sets. Only the gene sets that  
1067 are significantly different (FDR < 0.05) between the two groups being compared were  
1068 shown. Red color indicates upregulation in the first group, and blue indicates  
1069 downregulation. The size of the circle represents the nominal enrichment score (NES).  
1070 Right: similar GSEA analyses using human data from melanoma patients treated with  
1071  $\alpha$ PD1 monotherapy<sup>24</sup>. Gene set signatures of the two patient groups (Complete  
1072 Response (CR) + Partial Response (PR), and Stable Disease (SD) were compared to  
1073 patients with Progressive Disease (PD). **c**, Top: Volcano plots summarizing the  
1074 extracellular and transmembrane proteases differentially expressed between WT MC38  
1075 tumors treated with  $\alpha$ PD1 or IgG1 (n = 5). The threshold for differentially expressed genes  
1076 (opaque dots) was defined as P value  $\leq$  0.05 and  $|\log_2(\text{fold change})| \geq 1$ . Bottom: waterfall  
1077 plot showing the fold changes in transcript levels of proteases that are differentially  
1078 expressed between these two groups. The proteases are grouped into the families of  
1079 interest while the remaining are greyed out. **d**, Waterfall plot showing the fold changes in  
1080 transcript levels of proteases that are differentially expressed between  $\alpha$ PD1 treated  
1081 B2m<sup>-/-</sup> and Jak1<sup>-/-</sup> tumors (n = 5). **e**, Waterfall plot showing the fold changes in transcript  
1082 levels of proteases that are differentially expressed between human tumors from  
1083 responders (CR + PR) and non-responders (PD).

1084

1085

1086

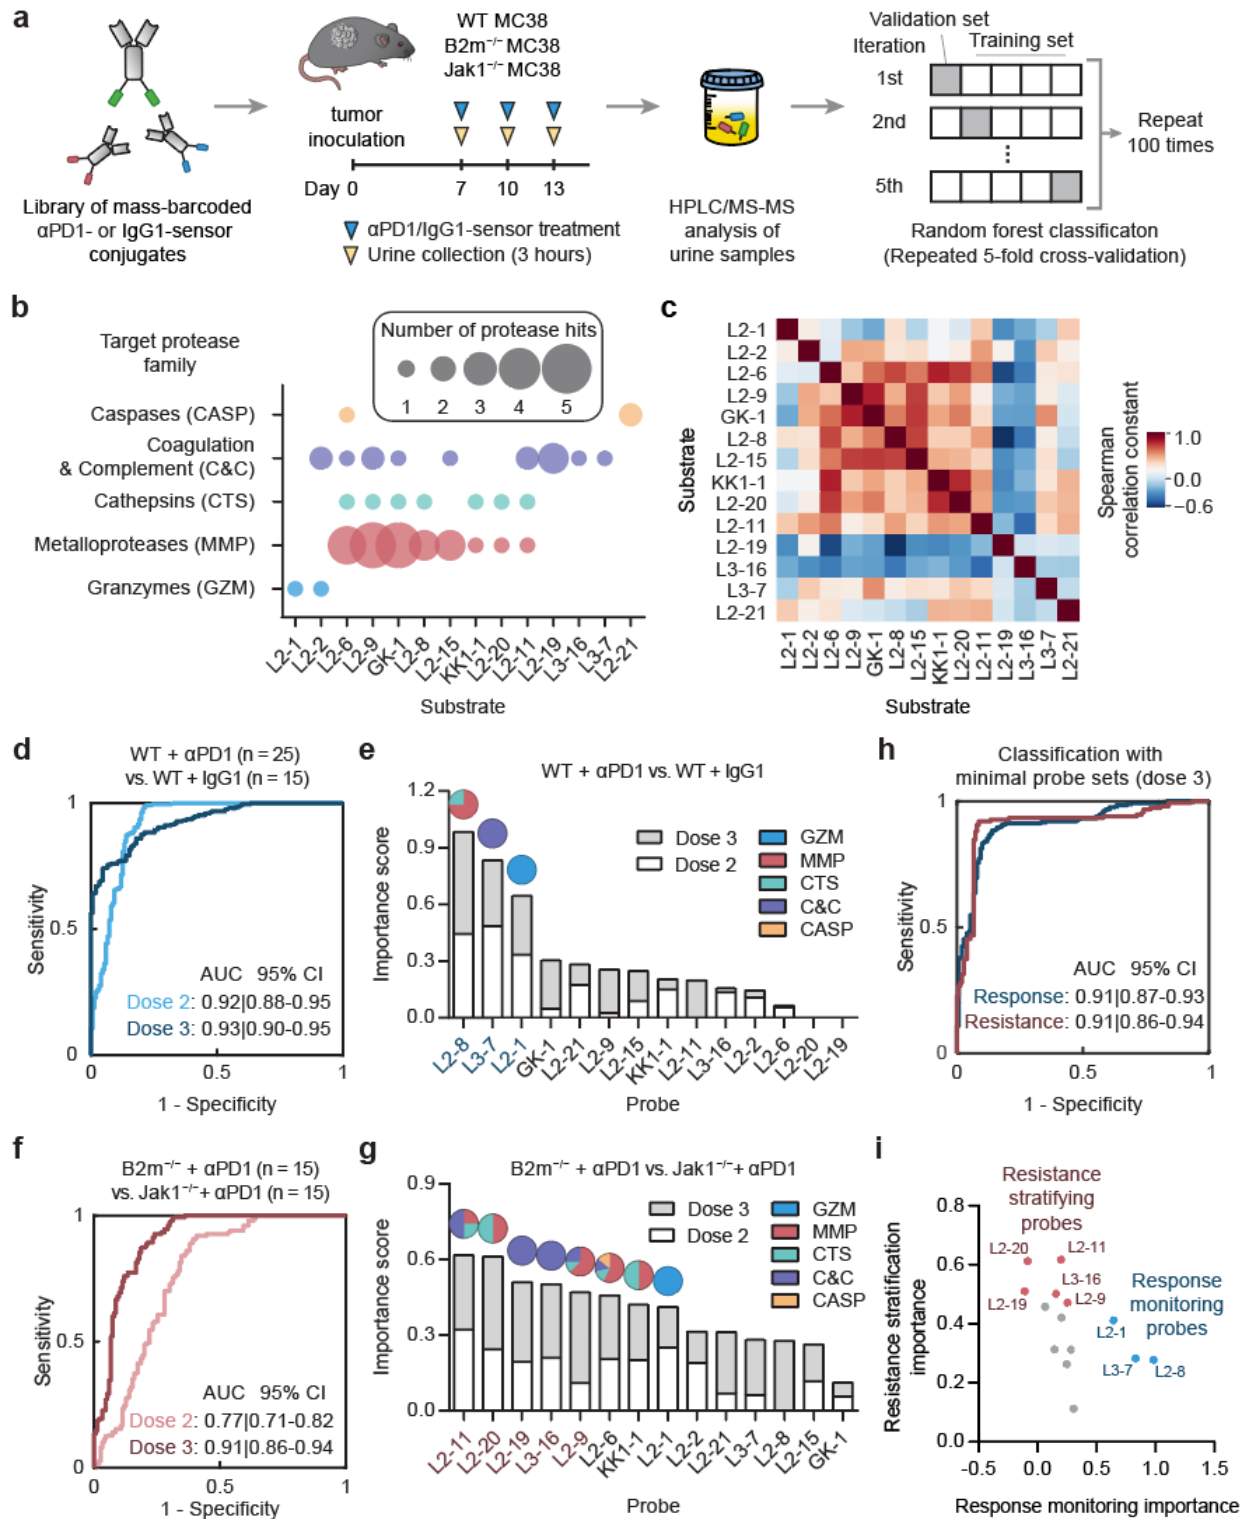

1087

1088 **Figure 6 | Urinary classification of ICB response and resistance. a**, Schematics of

1089 our pipeline to develop urinary classifiers of ICB response and resistance. **b**, Bubble plot



1090 showing the numbers of protease hits per target protease family for each substrate in the  
1091 INSIGHT multiplexed panel. A positive protease hit was defined as having average probe  
1092 fluorescence at 60 min post protease addition at least 2-fold above background signals.

1093 **c**, Correlation matrix showing the Spearman correlation between the protease cleavage  
1094 patterns of 14 peptide substrates in the INSIGHT panel. **d**, Area under the ROC curve  
1095 analysis showing the diagnostic specificity and sensitivity of random forest classifiers  
1096 based on INSIGHT library in differentiating between  $\alpha$ PD1-treated WT tumors ( $n = 25$ )  
1097 from IgG1-treated controls ( $n = 15$ ) using urine signals on the second (AUC = 0.92, 95%  
1098 CI = 0.88-0.95) or the third dose (AUC = 0.93, 95% CI = 0.90-0.95). **e**, Feature importance  
1099 analysis revealing the probes that are important for the response monitoring. Probes with  
1100 higher important scores, produced by random forest, have more important contribution to  
1101 the diagnostic performance. The pie charts above individual probes showing the protease  
1102 families that could be monitored by each probe. **f**, Area under the ROC curve analysis  
1103 showing the diagnostic specificity and sensitivity of random forest classifiers based on  
1104 INSIGHT library in differentiating between  $\alpha$ PD1-treated B2m<sup>-/-</sup> ( $n = 15$ ) from Jak1<sup>-/-</sup>  
1105 MC38 ( $n = 15$ ) tumors using urine signals on the second (AUC = 0.77, 95% CI = 0.71-  
1106 0.82) or the third dose (AUC = 0.91, 95% CI = 0.86-0.94). **g**, Feature importance analysis  
1107 revealing the probes that are important for resistance stratification. **h**, Area under the  
1108 ROC curve analysis showing the diagnostic specificity and sensitivity of random forest  
1109 classifiers based on the minimal set of 3 probes (L2-8, L3-7, L2-1) for response monitoring  
1110 (AUC = 0.91, 95% CI = 0.87-0.93) and on the set of 5 probes (L2-11, L2-20, L2-19, L3-  
1111 16, and L2-9) for resistance stratification (AUC = 0.91, 95% CI = 0.86-0.94). **i**, Scatter plot  
1112 showing feature important scores of all 14 probes in the INSIGHT panel for response

1113 monitoring and resistance stratification. The highlighted probes belong to the minimal  
1114 probe sets that achieve comparable diagnostic performance in these classification tasks  
1115 as compared to when using the entire panel.

1116
